1     **Cooperativity of myosin II motors in the non-regulated and regulated thin filaments**  
2                                   **investigated with high-speed AFM**

3  
4  
5  
6

7                                   Oleg S. Matusovsky<sup>1</sup>

8                                   Alf Mansson<sup>2</sup>

9                                   Dilson E. Rassier<sup>1\*</sup>

10

11             <sup>1</sup> Department of Kinesiology and Physical Education, McGill University, Canada

12             <sup>2</sup> Department of Chemistry and Biomedical Sciences, Linnaeus University, Kalmar,  
13             Sweden.  
14

15

16

17

18                                   \*Correspondence author: [dilson.rassier@mcgill.ca](mailto:dilson.rassier@mcgill.ca)

19

Article submitted to eLife

20

21

22     **Keywords: myosin motors, actin filaments, motors cooperativity, HS-AFM**

23

24     **Running title: Cooperativity of myosin II motors**

25

26 **Abstract**

27 Skeletal myosins II are non-processive molecular motors, that work in ensembles to produce  
28 muscle contraction while binding to the actin filament. Although the molecular properties of  
29 myosin II are well known, there is still debate about the collective work of the motors: is there  
30 cooperativity between myosin motors while binding to the actin filaments? In this study, we  
31 used high-speed AFM to evaluate this issue. We observed that the initial binding of small  
32 arrays of myosin heads to the non-regulated actin filaments did not affect the cooperative  
33 probability of subsequent bindings to neighboring sites and did not lead to an increase in the  
34 fractional occupancy of the actin binding sites. These results suggest that myosin motors are  
35 independent force generators when connected in small arrays, and that the binding of one  
36 myosin does not alter the kinetics of other myosins. In contrast, the probability of binding of  
37 myosin heads to regulated thin filaments under activating conditions (at high  $\text{Ca}^{2+}$   
38 concentration and with 2  $\mu\text{M}$  ATP) was increased with the initial binding of one myosin,  
39 leading to a larger occupancy of neighboring available binding sites. The result suggests that  
40 myosin cooperativity is defined by the activation status of the thin filaments.

41

42 **eLife digest**

43

44 Muscle contraction is the result of large ensembles of the molecular motor myosin II working  
45 in coordination while attached to actin. Myosin II produces the power stroke, responsible for  
46 force generation. In this paper, we used High-Speed Atomic Force Microscopy (HS-AFM) to  
47 determine the potential cooperativity between myosin motors bound to non-regulated and  
48 regulated thin filaments. Based on the direct visualization of myosin-actin interaction,  
49 probability of myosin binding, and the myosin fractional occupancy of binding sites along non-  
50 regulated and regulated actin filaments, our results show no cooperative effects over ~100  
51 nm of the actin filament length. In contrast, there is myosin cooperativity within the activated  
52 thin filament, that induces a high affinity of myosin heads to the filaments. Our results support  
53 the independent behaviour of myosin heads while attached to actin filaments, but a  
54 cooperative behavior when attached to regulated thin filaments.

55

56

## 57 **Introduction**

58 Myosin II is a non-processive molecular motor that binds to actin filaments to produce  
59 mechanical work, using the chemical free energy of adenosine triphosphate (ATP). After an  
60 initial attachment to actin, the myosin motor domain undergoes conformational changes  
61 associated with release of the ATP hydrolysis products inorganic phosphate ( $P_i$ ) and ADP  
62 from the active site of myosin. In this process, a force-generating power stroke, with swing of  
63 the myosin lever arm, is generated and there is a transition of myosin from the weak to the  
64 strong actin-binding states (Rayment et al., 1993; Fisher et al., 1995; Mansson et al., 2018;  
65 Robert-Paganin et al., 2020).

66  
67 Myosin II molecules form bipolar filaments in skeletal, cardiac and smooth muscles and this  
68 filamentous form of myosin II allows the motors to collectively produce high forces during  
69 muscle contraction despite a low duty ratio (Finer et al., 1994; Ishijima et al., 1994; Yanagida  
70 & Ishijima, 1995; Kaya & Higuchi, 2010; Kaya et al., 2017; Pertici et al., 2018; Cheng et al.,  
71 2019; Cheng et al., 2020). The actin-attached fraction of the ATP turnover time, the duty  
72 ratio, is  $\sim 5\%$  (Howard, 1997), which enables high speeds of shortening (Pertici et al., 2018;  
73 Cheng et al., 2020). Although most studies looking to the mechanics of isolated myosin II  
74 have been performed with single molecules, assemblies of myosin II have been investigated  
75 in arrays developed with a small number of motors adsorbed to silica beads (Debold et al.,  
76 2005), optical fiber surfaces (Pertici et al., 2018) or with the native thick filaments (Cheng et  
77 al., 2020). These small ensemble studies show a load dependence and force-velocity relation  
78 that is similar to that observed in myofibrillar (Lowey et al., 2018) and cellular preparations  
79 (Edman & Hwang, 1977). Furthermore, these force-velocity relationships can be modelled  
80 using single molecule properties (Mansson et al., 2018; Mansson, 2019), and experimental

81 data from single molecules (Kaya & Higuchi, 2010; Capitanio et al., 2012; Sung et al., 2015)  
82 suggesting that myosin II motors are independent force generators, as postulated decades  
83 ago (Huxley, 1957), even when they are attached to a common thick filament.

84

85 However, there are also suggestions that myosin molecules work cooperatively, and the work  
86 produced by motor assemblies is different from individual motors (Kaya et al., 2017).  
87 Accordingly, the attachment of one motor would interfere with the kinetics and attachment  
88 mechanics of other motors when working in arrays. The result casts doubt on the concept of  
89 independent force generators in motor assemblies. Cooperativity could also arise in double-  
90 headed molecules (Huxley & Tideswell, 1997; Brunello et al., 2007) or myosin motors that  
91 bind to adjacent actin sites (Caremani et al., 2013; Rahman et al., 2018). X-ray diffraction  
92 studies using muscle fibre preparations provide evidence that the coordinated movements of  
93 myosin heads may indeed regulate force generation (Irving et al., 1992; Linari et al., 2015).  
94 Finally, this form of cooperativity may arise from allosteric changes of the actin filament itself  
95 so that binding of one myosin molecule modifies the kinetics of myosin binding to nearby  
96 sites (Orlova et al., 1993; Tokuraku et al., 2009; Prochniewicz et al., 2010).

97

98 Other forms of cooperativity between myosin motors involve activation of the thin filament  
99 where several cooperative phenomena have been described (Gordon et al., 2000). In skeletal  
100 muscle sarcomeres, actin–myosin interactions are regulated by  $\text{Ca}^{2+}$  through the regulatory  
101 proteins troponin (Tn) and tropomyosin (Tm), that form the thin filament complex with actin.  
102 Each of the Tm molecules contact seven actin monomers and is associated with the three Tn  
103 subunits: Tn-T, Tn-I and Tn-C . Upon  $\text{Ca}^{2+}$  binding to Tn-C, conformational changes are  
104 triggered in the Tn–Tm complex resulting in a displacement of Tm that allows for myosin

105 binding to actin (Galinska-Rakoczy et al., 2008; Lehman et al., 2009). We previously have  
106 shown that under relaxing conditions, thin filaments presented a combination of activated and  
107 non-activated segments along their lengths, and were not blocked from myosin; the  
108 equilibrium between blocked and closed states was defined by  $\text{Ca}^{2+}$ -induced Tn-Tm  
109 conformational changes (Matusovsky et al., 2019). In addition, myosin binding to actin is also  
110 required for full activation, or to induce the open state of activation of the thin filament  
111 (McKillop and Geeves, 1993; Smith & Geeves, 2003; Desai et al., 2015). When myosin binds  
112 to actin, it may directly affect the regulatory system by changing the conformation of Tm, such  
113 that other myosin heads can attach to thin filaments (Geeves & Holmes; 1999; Gordon et al.,  
114 2000). Furthermore, the question remains if one or two myosin heads in a molecule are  
115 required for the full activation of the thin filament.

116

117 Therefore, cooperativity during myosin II-actin interactions can conceptually arise from at  
118 least two sources: cooperativity among myosin molecules within the thick filaments due to  
119 structural changes in the actin filament or cooperativity through activation of the regulated,  
120 thin filaments. Each cooperativity source may present different mechanisms. In this study, we  
121 used High-Speed Atomic Force Microscopy (HS-AFM) to evaluate the potential cooperativity  
122 of double-headed heavy meromyosin fragments (HMM) of myosin II that were connected  
123 through the S2 tail regions, while attaching between non-regulated actin filaments, or  
124 regulated thin filaments. Because HS-AFM allows the investigation of protein dynamics with  
125 nanometer spatial and millisecond temporal resolutions (Kodera et al., 2021; Heath &  
126 Scheuring, 2018; Matusovsky et al., 2021) our experimental approach allows us to  
127 investigate important aspects of myosin cooperativity, with a better resolution than previous  
128 fluorescence microscopy studies (spatial resolution limitation of  $>100$  nm) (Desai et al.,

129 2015) . Specifically for this study, we developed a method in which HMM motors, attached by  
130 their S2 regions to form a structure with up to 8-10 individual myosin heads (4-5 HMM  
131 molecules) bound to nearby sites along two actin filaments or two thin filaments (Fig. 1 and  
132 Fig. S1). The benefit of this approach is the ability to monitor the behavior of each of the  
133 HMM heads over the time of an experiment to evaluate the potential cooperative binding of  
134 HMM heads with either actin or thin filaments during the ATPase cycle. The approach also  
135 allows investigation of aspects of inter-head cooperativity as well as the potential to  
136 investigate cooperative changes along actin or thin filaments at spatial resolution similar to  
137 the inter-monomer distance along the filaments.

138

## 139 **Results**

### 140 **Experimental design to study myosin cooperativity by HS-AFM**

141 In order to track the cooperativity behavior of the myosin heads within a sequence of  
142 successive HS-AFM images, we used an experimental approach in which pairs of HMM  
143 heads are attached to two actin filaments (Fig. 1, Fig. S1), as explained in details in a  
144 previous study from our laboratory (Matusovsky et al., 2021). Briefly, we aimed for an  
145 experimental situation in which two non-regulated actin filaments (F-actin) or two regulated  
146 cardiac thin filaments (cTFs) were bound to an underlying mica-supported lipid bilayer (SLB)  
147 surface, in parallel to each other, and with enough space for binding of double-headed HMM  
148 molecules between them. A cross-section analysis showed that the distance between two  
149 actin filaments during the experiments was  $40.56 \pm 9.65$  nm, and the distance between cTFs  
150 was  $67.69 \pm 15.92$  nm (Fig. S2). The observed difference in distance ( $27.1 \pm 6.1$  nm) between  
151 non-regulated F-actin and regulated cTFs did not affect the HMM binding and displacement  
152 analysis (Figs 1f, 2c).

153

154 Once the filaments were found in a parallel orientation, HMM fragments were added into the  
155 HS-AFM chamber filled with an experimental solution or placed on the top of the mica-SLB  
156 surface, in a solution containing 0.2-10  $\mu$ M of NPE-caged or non-caged ATP. We then  
157 searched for events where each of the two HMM heads would interact with two parallel  
158 filaments. Immediately after both HMM heads were bound between parallel actin filaments,  
159 we activated the NPE-caged ATP in the solution by photolysis using a UV laser (340 nm)  
160 installed into the HS-AFM system (see Materials and Methods). The HS-AFM snapshots of  
161 two parallel non-regulated F-actins or regulated cTFs showed regularly bound HMM  
162 molecules between them in the absence or in the presence of ATP (Figs S1, S2). The  
163 globular upper and lower heads of each HMM molecule were bound in  $\sim$ 30-37 nm proximity  
164 from each other, along the actin half-helical pitch structure (Fig. 1, Fig. S2). HMM heads were  
165 not bound to all the available actin-binding sites along the filaments at various experimental  
166 conditions, including rigor or in the presence of ADP in similarity to electron microscopy  
167 studies (Orlova et al., 1993). This observation may be related to the immobilization of S2  
168 regions of each HMM molecule to the underlying lipid bilayer, allowing it to reach a maximum  
169 of  $\sim$ 2-3 binding spots between neighboring actin monomers, i.e., 11 nm or  $2 \times 5.5$  nm  
170 (Fig.1b). The  $\sim$ 37 nm arrangement of myosin heads in our HS-AFM experiments is similar to  
171 the preferable binding sites of myosin heads along actin filaments (Steffen et al., 2001) and  
172 relate to the  $\sim$ 37 nm hotspots for myosin head bindings along the thin filaments in the A-band  
173 of the sarcomere (Wang et al., 2021).

174



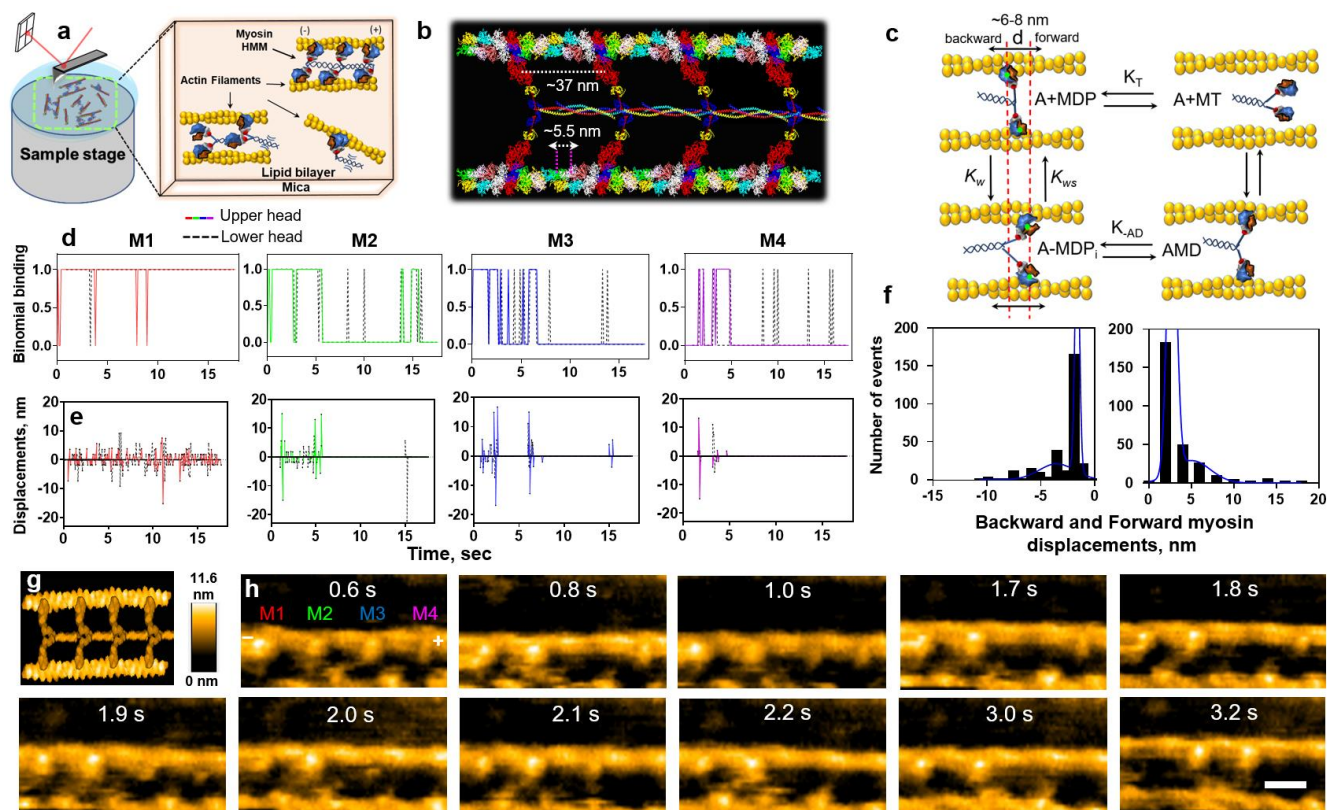

175

176 **Figure 1. The kinetics of double-headed myosin motors bound to non-regulated actin**  
 177 **filaments.** (a) Diagram illustrating the approach used to study cooperative behavior of HMM  
 178 molecules bound between two parallel filaments. (b) Structural model of actin-myosin complex for the  
 179 experimental design used in the study; actin-myosin complex in rigor conditions (PDB:1M8Q)  
 180 with upper and lower heads bound between two parallel actin filaments and attached by their S2  
 181 fragments (PDB: 2FXO). (c) Kinetics model of actin-myosin interaction and approach used to calculate the  
 182 backward and forward myosin displacements; the green dots indicate the center of mass of the head.  
 183  $K_T$  and  $K_{AD}$  are the constants of the ATP binding and ADP release;  $K_w$  and  $K_{ws}$  are the constants of the  
 184 weak binding and weak-to-strong transition, respectively. (d-e) Representative time course of  
 185 binomial binding (d) and head displacements (e) calculated for the individual HMM molecules (M1-  
 186 M4) at the given time for upper and lower heads of each HMM molecule in the presence of 2  $\mu$ M ATP.  
 187 (f) The backward and forward myosin displacements in the F-actin-HMM complex ( $n=6$ , 589 events,  
 188  $\sim 43$  HMM molecules); data sets were fitted by sum of two Gaussians ( $r^2=0.97$  and  $r^2=0.99$ ,  
 189 respectively). The two peaks for backward displacement:  $1.8 \pm 0.2$  nm and  $3.7 \pm 2.0$  nm; the two peaks  
 190 for forward displacement:  $2.7 \pm 0.5$  nm and  $5.1 \pm 2.1$  nm. (g) Simulated HS-AFM image of the structural  
 191 model shown in (b) performed in Bio-AFM viewer software (Amyot & Flechsig, 2020). (h)  
 192 Representative HS-AFM snapshots of HMM molecules bound between two actin filaments at the  
 193 indicated times (M1-M4 shown in color code duplicated in the d-e and across all of the figures), scale  
 194 bar 30 nm. Related to Movies S1-S3.

195

196

197

### Kinetics of actin-myosin interaction in the non-regulated and regulated systems

198

We characterized functional parameters of the myosin heads bound between two parallel

199

non-regulated F-actins or regulated cTFs, including the average backward and forward

200 displacements ( $d$ ) of myosin heads in the presence of ATP (and high  $\text{Ca}^{2+} = \text{pCa } 4.5$  in the  
201 case of cTFs). The HMM displacements calculated as a change in the center of mass (COM)  
202 of the myosin head at the given time during the experiment (Fig. 1c, see also Materials and  
203 Methods) were in the range of 6-8 nm. The backward (towards minus end of the filament) and  
204 forward (towards plus end of the filament) HMM displacements were calculated. The size  
205 distribution of HMM displacements revealed two distinct peaks in F-actin-HMM and cTFs-  
206 HMM complexes that most likely represent the events occurring through ADP (1-3 nm  
207 displacements) and  $\text{P}_i$  releases (over 3 nm displacements as previously described  
208 (Matusovsky et al., 2021)). The sum of two peaks for backwards and forward displacements of  
209 HMM molecules were  $5.5 \pm 1.68$  nm and  $7.8 \pm 1.96$  nm on the non-regulated actin filaments,  
210 and  $7.4 \pm 1.73$  nm and  $7.6 \pm 1.95$  nm on the regulated cTFs (Figs. 1f and 2c).

211

212 The evaluation of displacement and working stroke of myosin heads in the HS-AFM was  
213 described in details in the Materials and Methods. Briefly, the working stroke is viewed as a  
214 transition from the weak to the strong-binding states evaluated by the changes in the lever  
215 arm movement. The change in the lever arm considers a defined polarity of the actin filament.  
216 In the presence of Mg.ATP, myosin heads detach from the filament and re-attach to the same  
217 or a new binding site, allowing us to determine the displacement of the myosin head by the  
218 change in COM. The calculated displacement in our study is slightly larger than the working  
219 stroke size of 5 nm reported for S1 (Capitanio et al., 2006) and slightly smaller than the  
220 values obtained from structural studies with single-headed myosin (~10-12 nm) (Geeves et  
221 al., 2005). It is comparable with studies performed with myosin molecules evaluated with  
222 laser tweezers (Finer et al., 1994; Tyska et al., 1999) and single fiber mechanics (Piazzesi et  
223 al., 2002).

224

225 The representative binomial binding traces of the individual upper and lower myosin heads in  
226 the F-actin-HMM (Fig. 1d, Movies S1-S3) and in the cTFs-HMM (Fig. 2a, Movie S4) revealed  
227 that binding of one HMM head is not necessarily accompanied by the binding of the second  
228 HMM head for the given HMM molecule (M1-M4, Figs 1d and 2a). To specifically investigate  
229 the coordination between two heads in a molecule we analyzed the binding events at the  
230 different ATP concentrations. Tellingly, the binding events of two heads of given HMM  
231 molecule bound between two filaments was higher at lower ATP concentrations. At the higher  
232 ATP concentrations, the binding of either one head or two heads was approximately equally  
233 distributed (Fig. S3).

234

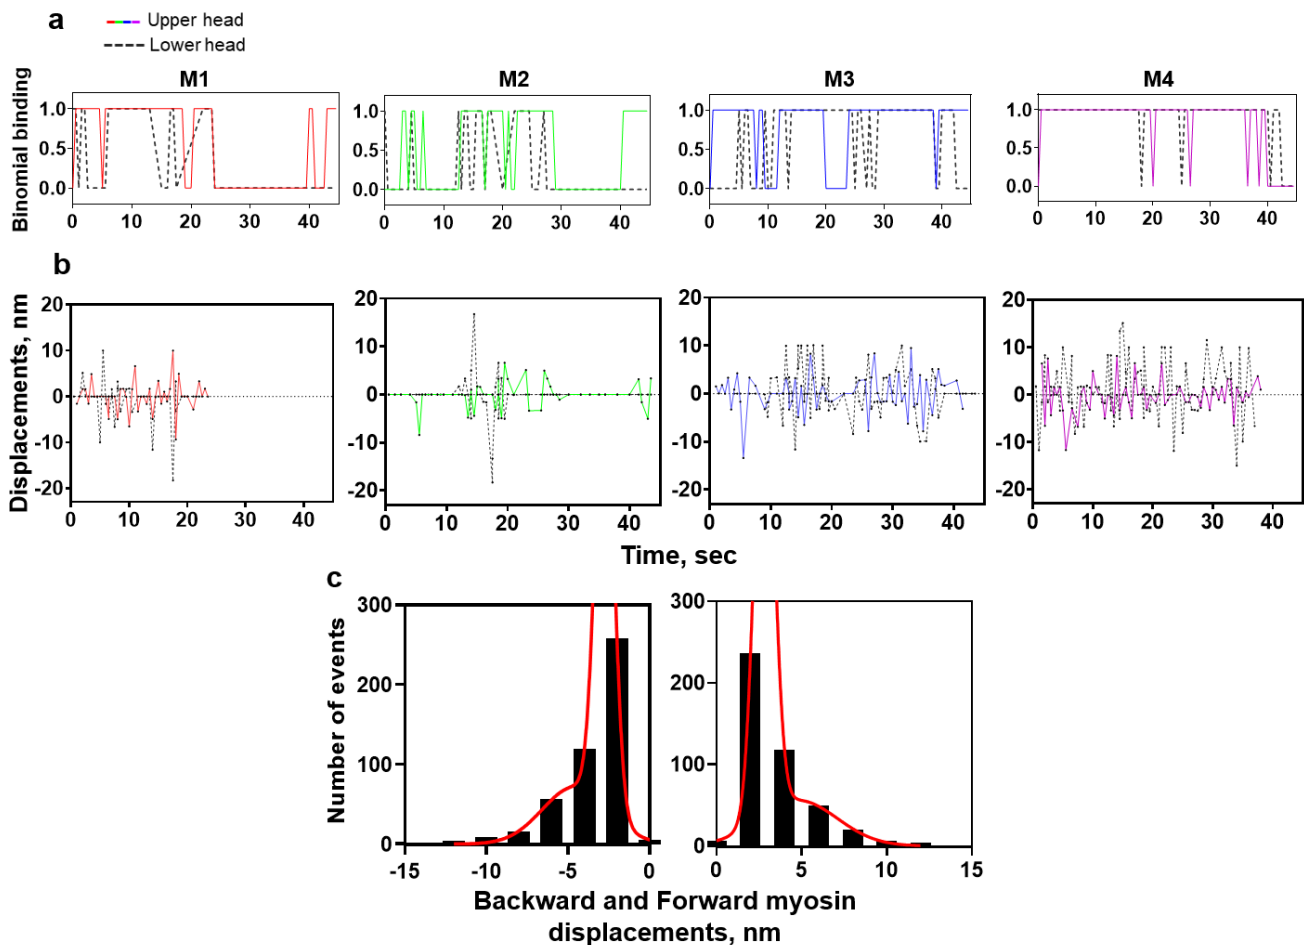

235

236 **Figure 2. The kinetics of double-headed myosin motors bound to regulated cTFs. (a-b)**  
237 Representative time course of binomial binding (a) and heads displacements (b) calculated for the  
238 individual HMM molecules (M1-M4) at the given time for upper and lower heads of each HMM  
239 molecule in the presence of 0.5  $\mu\text{M}$  ATP and high  $\text{Ca}^{2+}$  concentrations. (c) The backward and forward  
240 myosin displacements in the cTFs-HMM complex ( $n=5$ , 911 events,  $\sim 35$  HMM molecules); data sets  
241 were fitted by sum of two Gaussians ( $r^2=0.99$  and  $r^2=0.99$ , respectively).  
242

243

## 244 **Probability of HMM binding to the non-regulated and regulated actin filaments**

245 To monitor the probability of binding events between individual myosin heads we applied a  
246 probability analysis based on a binary combination: HMM bound to the filaments equals to “1”  
247 and HMM detached from the filaments equals to “0”. To use this analysis, we need to  
248 evaluate if there is any directional bias in the myosin bindings along the F-actin and cTFs,  
249 either towards the barbed plus end or the pointed minus end of the filaments. Therefore, the  
250 polarity of F-actin and cTFs complexed with HMM was determined by using the morphology  
251 of the myosin heads bound to the filaments (Ngo et al., 2015). The bound myosin heads  
252 observed in the presence of Mg.ATP, Mg.ADP or in the rigor state allowed us to determine  
253 the polarity of the filaments (see Figs S1, S2-S5). According to our observations the most  
254 frequent myosin head orientation in the weak binding state (presence of Mg.ATP- $\gamma$ -S) or  
255 strong binding state (rigor state) is the one where the heads of HMM molecules are  
256 positioned toward the minus end of the filament (Fig. 1h, Fig. 3a-b, Fig. 4b-d, Fig. S5).  
257 Therefore, binding events that occurred towards to the plus end of the filament ( $M_n \rightarrow M_{n+1}$ )  
258 for individual upper and lower myosin heads at ATP concentrations ranging from 0.2-10  $\mu\text{M}$   
259 were used in the analysis.

260

261 Initially, we tested binding of HMM between two filaments in rigor conditions, i.e., in the  
262 absence of ATP and  $\text{Ca}^{2+}$ , or in the presence of ATP- $\gamma$ -S, a slowly hydrolyzed analog of ATP  
263 (Fig. S5). At these conditions the HMM heads were tightly bound between two filaments with

264 high fractional occupancies: ~95% for the non-regulated F-actin and ~79% for the native  
 265 cTFs. The latter observation is consistent with the idea that the binding sites on cTFs in the  
 266 absence of  $\text{Ca}^{2+}$  and ATP are present in an equilibrium between the blocked, closed and  
 267 open states (Movie S4) (Matusovsky et al., 2019; Risi et al., 2017; Risi et al., 2021).  
 268

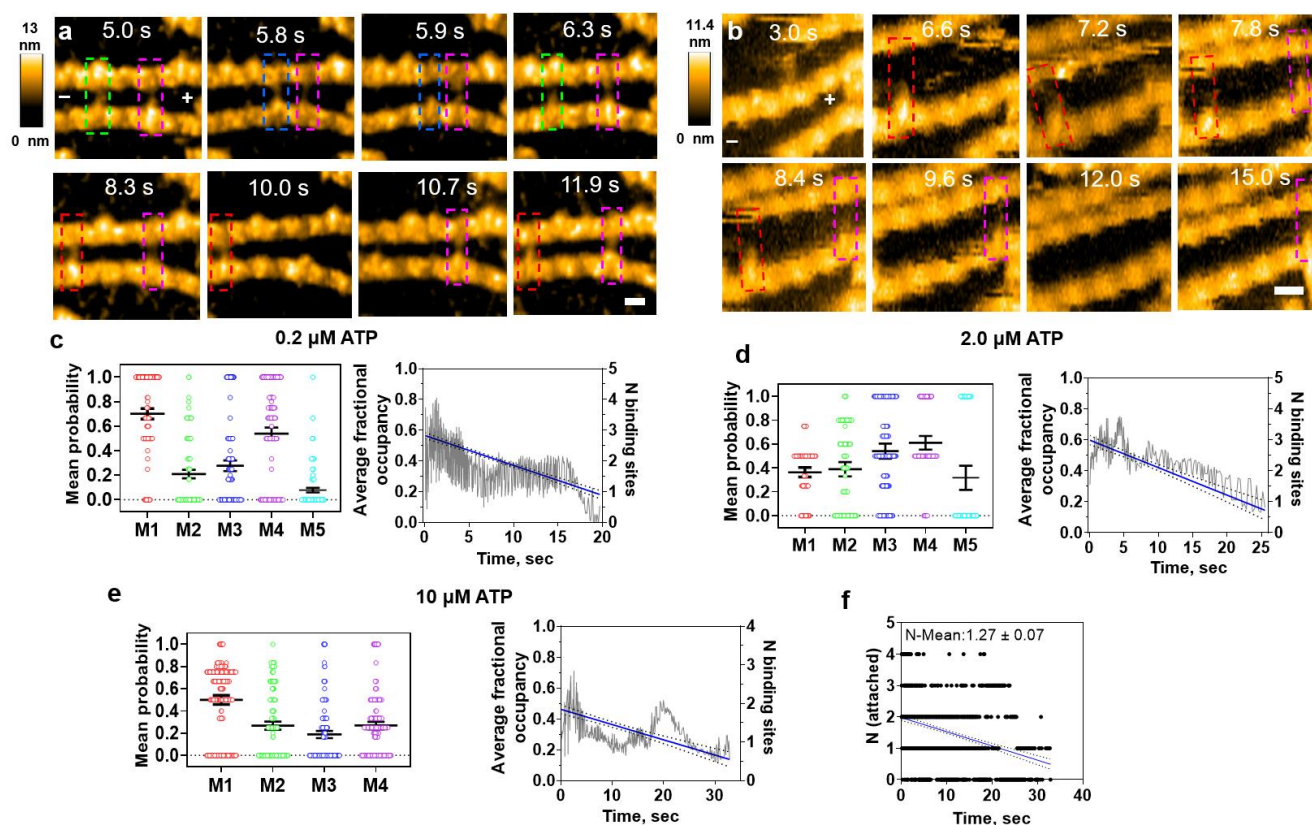

269

270 **Figure 3. Probability of myosin heads binding to the non-regulated actin filaments.** (a-b)  
 271 Successive HS-AFM images of F-actin-HMM complexes, where HMM heads bind between two actin  
 272 filaments in the presence of 0.2 μM ATP (a) or 2 μM ATP (b). Dashed color boxes indicate upper and  
 273 / or lower HMM heads bound between two actin filaments. Numbers on each frame show the time in  
 274 seconds. Related to Movies S1-S3. Scale bars: 30 nm. (c-e) Probabilities of the individual HMM head  
 275 binding to the 4 or 5 binding sites on the non-regulated actin filaments in the presence of 0.2 μM ATP  
 276 (c, 1235 events), 2 μM ATP (d, 567 events) and 10 μM ATP (e, 934 events). The average fractional  
 277 occupancies by HMM heads for all of the sites for each of the ATP conditions showed a decrease in  
 278 the occupancy with time (right panels in c-e, n=4). (f) Frequency distributions for the number of  
 279 myosin heads attached to 4 neighboring binding sites along a given actin filament or thin filament over  
 280 time (n=8 experiments, ~35 HMM molecules, 898 events). Mean number ( $\pm$  95% CI) of attached  
 281 myosin heads relative to the 4 available binding sites given in the inset text. Full lines and dashed  
 282 lines in the right panels in (c-f) represent the regression lines and 95% confidence intervals,  
 283 suggesting a decline in the number of myosin molecules in time.  
 284  
 285

286 The probability analyses revealed that binding of  $M_n$  myosin head to the non-regulated actin  
287 filaments did not affect the subsequent bindings of the next  $M_{n+1}$  molecule (towards the plus  
288 end of the filament) in the presence of different ATP concentrations (Fig. 3, Movies S1-S3).  
289 While we can observe some random increase in the binding probabilities with 0.2  $\mu\text{M}$  ATP or  
290 2  $\mu\text{M}$  ATP concentrations (Fig.3c-d) towards the plus end of the filament, the average  
291 fractional occupancy indicates a constant decrease in the occupancy of the binding sites with  
292 time, in all ATP concentrations used in this study (Fig. 3c-e, right panels). These data are  
293 consistent with the results pooled from 8 different experiments, suggesting that in the F-actin-  
294 HMM complex the most frequently observed events represent occupation of one binding site  
295 or no binding with the average number of occupied sites calculated as  $1.27 \pm 0.07$  (Fig. 3f).  
296 These results suggest that HMM molecules are frequently detached from actin in the  
297 presence of ATP due to a lower affinity of myosin to actin in comparison to the affinity to the  
298 thin filaments (Fig. S4). This idea is consistent with the different time evolutions of the  
299 number of HMM molecules with actin and thin filaments (Figs. 3f and 4h) in the presence of  
300 ATP. It is also consistent with findings that the fractional occupancy of actin-binding sites in  
301 the absence of ATP (rigor) or presence of slowly hydrolyzed ATP- $\gamma$ -S did not change with  
302 time (Fig. S5) when HMM is bound to both actin and the thin filaments all the time,  
303 suggesting that the myosin heads did not detach from the filaments over the time of the  
304 experiment due to interaction with the scanning cantilever tip.

305

306 At the non-activating conditions with thin filaments in the blocked state (0.5  $\mu\text{M}$  ATP, pCa  
307 9.0), myosin heads revealed a similar decrease in the binding probability and fractional  
308 occupancy (Fig. 4e) compared to the bare F-actin-HMM complex. In contrast, the probability  
309 of myosin heads binding to cTFs in the closed state under activating conditions (0.5  $\mu\text{M}$  ATP,

310 pCa 4.5) was increased (Fig. 4f-g, Movie S4) compared to myosin heads binding to actin  
 311 filaments (Fig. 3c-d). This feature is reflected in the increased average number of attached  
 312 myosin heads in the cTFs-HMM complex under activating conditions, almost doubling the  
 313 average number of bound heads (Fig. 4h) compared to the situation with the F-actin-HMM  
 314 complex (Fig. 3f). The increase in probability of binding of the myosin heads to the cTFs is  
 315 also matched in the kymograph images of cTFs-HMM complex at the high  $[Ca^{2+}]$  and different  
 316 ATP concentrations, when compared to the kymograph images obtained from F-actin-HMM  
 317 complex at the various ATP concentrations (Fig. S4). The random presence of activated and  
 318 non-activated sites across cTFs at the relaxing (pCa > 8) or activating (pCa 4.0-4.5)  
 319 conditions (Risi et al., 2017; Matusovsky et al., 2019) complicated the analysis and can  
 320 explain the pattern of varied mean probabilities between HMM molecules (Fig. 4f-g).  
 321

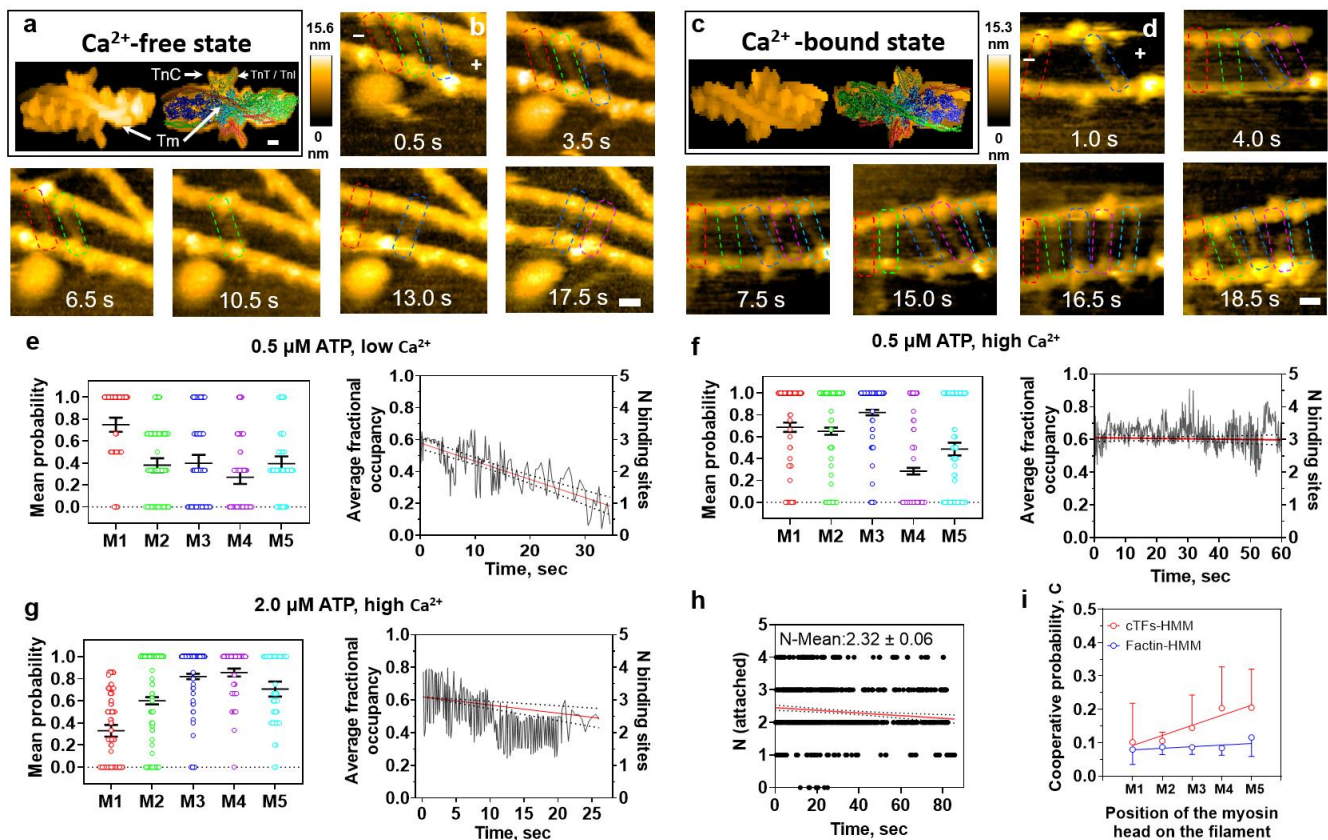

322

323 **Figure 4. Probability of myosin heads binding to the regulated cTFs.** (a, c) Fitting the simulated  
324 HS-AFM images (Amyot & Flechsig, 2020) of the cTFs at Ca<sup>2+</sup>- free (a) and Ca<sup>2+</sup>-bound (c) states into  
325 the cTFs molecular structures, scale bar: 2.5 nm. PDB: 6KN7 and 6KN8 for Ca<sup>2+</sup> free and high Ca<sup>2+</sup>  
326 states, respectively. (b, d) Representative HS-AFM snapshots of HMM molecules bound between two  
327 cTFs in the presence of 0.5 μM ATP and either low Ca<sup>2+</sup> (b) or high Ca<sup>2+</sup> (d) concentrations at the  
328 indicated times. Scale bars: 30 nm. Note, that the number of bound heads increase with time in (d).  
329 (e-g) Probabilities of the HMM heads binding to the regulated cTFs in the presence of 0.5 μM ATP  
330 and low Ca<sup>2+</sup> (492 events) (e) or 0.5 μM ATP and high Ca<sup>2+</sup> concentrations (2830 events) (f) or 2 μM  
331 ATP and high Ca<sup>2+</sup> concentration (1839 events) (g) with the corresponding average fractional  
332 occupancy vs time shown in the right panels. (h) Frequency distributions for the number of myosin  
333 heads attached to 4 neighboring binding sites along all studied thin filaments over time in the  
334 activating conditions (n=7 experiments, ~35 HMM molecules, 932 events). Mean number (± 95% CI)  
335 of attached myosin heads relative to the 4 available binding sites given in the inset text. Full lines and  
336 dashed lines in the right panels in (e-h) represent regression lines and 95% confidence intervals. The  
337 analysis suggested a decline in the number of myosin molecules with time, but to a lower degree  
338 compared to the F-actin-HMM complex. (i) Cooperative probability of binding of myosin heads in F-  
339 actin-HMM and cTFs-HMM complexes (n=7: cTFs-HMM n=8: F-actin-HMM, ~40-50 HMM molecules  
340 in each data sets were analyzed; the data points shown as mean value ± 95% CI).  
341  
342

#### 343 **Cooperativity in the non-regulated and regulated actin-myosin systems**

344 To quantify the observed probability binding pattern in the binary system, we applied the  
345 following equation  $C = \binom{n}{k} p^k (1 - p)^{n-k}$ , where C denotes cooperative probability of binding  
346 between neighboring myosin heads, n = number of total events or subsequent frames of the  
347 experiment; k = number of binding events in the subsequent frames, p = probability of  
348 binding, *i.e.* the ratio between binding events and total events, and  $\binom{n}{k}$  represents the  
349 combination of total and binding events expressed as  $\frac{n!}{k!(n-k)!}$  (see Supplementary Table 1).  
350

351 Following this analysis, we found no change in the probability of cooperative binding of the  
352 HMM heads to the non-regulated actin filaments. It suggests that the interaction in the F-  
353 actin-HMM complex is largely random. The linear regression slope of the cooperative  
354 probability binding between neighboring myosin heads in the F-actin-HMM complex showed  
355 no significant deviation from zero (p = 0.295) with the Pearson's r = 0.766 and r<sup>2</sup> = 0.59. In  
356 contrast, the linear regression slope of the cooperative probability binding between



357 neighboring myosin heads in the cTFs-HMM complex showed significant deviation from zero  
358 ( $p = 0.022$ ) with the Pearson's  $r = 0.953$  and  $r^2 = 0.91$  (Fig. 4i). In accordance with these  
359 results, the individual fitting for each experiment demonstrated an increase in the cooperative  
360 probability of binding of the HMM heads to the regulated cTFs in comparison to that of in F-  
361 actin-HMM complex (Figs S6 and S7). This is broadly consistent with cooperativity, although  
362 the degree of cooperative binding in the cTFs-HMM was variable between experiments as  
363 can be noticed from confidence intervals (Fig. 4i).

364

365

## 366 **Discussion**

367 In this study, we used a binomial probability analysis to evaluate the potential cooperativity  
368 between myosin motors while attached to actin or regulated thin filaments. Our experimental  
369 approach – using myosin motors that can attach between two filaments positioned in parallel  
370 on the surface - is particularly well-suited for this analysis, and we could visualize several  
371 different motors at the same time. Despite this approach has geometrical features that are  
372 distinct from those of the actin-myosin arrays operating within a muscle sarcomere, it has  
373 been recently shown that each of the double myosin heads can acquire different lever arm  
374 confirmations and bound two different thin filaments in rigor (Wang et al., 2021). This is also  
375 true when myosin attaches to actin and thin filaments in the presence of ATP, when each  
376 head may be in a different state, at a given time of the ATPase cycle (Matusovsky et al.,  
377 2021). This feature may enable myosin double heads to interact with two different thin  
378 filaments within the sarcomere, potentially maximizing muscle power and efficiency. Of  
379 particular interest, is the fact that myosin motors can be assumed as the independent force  
380 generators even when connected in small assemblies.

381 The displacements produced by each individual myosin head within a given HMM molecule in  
382 our experimental conditions were in the range of ~6-8 nm, slightly larger than the working  
383 stroke size of 5 nm reported for myosin S1 (Capitanio et al., 2006) and slightly smaller than  
384 the values obtained from structural studies with single-headed myosin (~10-12 nm) (Geeves  
385 et al., 2005). It is comparable with studies performed with myosin molecules evaluated with  
386 laser tweezers and single fiber mechanics (Finer et al., 1994; Tyska et al., 1999; Piazzesi et  
387 al., 2002). Therefore, our results are consistent with studies utilizing different techniques.

388

### 389 **Cooperativity between myosin motors**

390 There are several studies suggesting that myosin molecules work cooperatively (Vilfan &  
391 Duke, 2003; Hilbert et al., 2013; Kaya et al., 2017; Hwang et al., 2021), and that the work  
392 produced by assemblies of motors is different from individual motors. For instance, a study  
393 using synthetic myosin filaments measured 4 nm stepwise actin displacements at a high load  
394 (>30 pN). Due to the fact that the mechanical work of  $4 \times 30 \text{ pN nm} = 120 \text{ pN nm} \approx 30 k_B T$   
395 ( $k_B$ : Boltzmann constant; T absolute temperature) is greater than the free energy of Mg.ATP  
396 turnover (25  $k_B T$ ), the authors concluded that the steps they observed could not be produced  
397 by single motors but potentially due to coordinated force generation by several myosin  
398 motors (Kaya et al., 2017, Hwang et al., 2021). Despite the fact that theoretical analysis  
399 (Duke, 1999; Månsson, 2020) suggests that this finding is consistent with previous models of  
400 independent force generators as proposed previously (Huxley, 1957; Huxley, 1988; Hill,  
401 1974), it casted some doubt on this concept when motors work in arrays. In this regard, the  
402 present study is consistent with fully independent force-generators along the actin filaments.  
403 Importantly, the HS-AFM approach allows us to demonstrate that this applies for neighboring  
404 actin target zones separated by ~37 nm, appreciably shorter than possible to resolve under

405 dynamic conditions using fluorescence microscopy (e.g. Desai et al, 2015). This result does  
406 not seem to be consistent with previous findings suggesting that binding of a myosin head  
407 allosterically affects the properties of the entire actin filament with potential changes of  
408 myosin affinity at other sites (Tokuraku et al., 2009). However, because we have only  
409 performed our studies under a limited number of specific conditions, we cannot completely  
410 exclude that such allosteric effects occur under certain conditions, e.g. at submicromolar  
411 concentrations of Mg.ATP as in some of the experiments of Tokuraku et al 2009. In contrast  
412 to the results with pure F-actin we found strong evidence for cooperativity between  
413 neighboring thin filament target zones as further considered in detail below.

414

415 Another form of cooperativity has been suggested by X-ray diffraction studies using muscle  
416 fibre preparations, indicating that the two heads of a given myosin molecule may bind  
417 sequentially to resist stretch of the active muscle (Brunello et al., 2007). Such sequential  
418 actions of the two heads have also been suggested (Edman et al., 1997, Huxley & Tideswell,  
419 1997; Conibear & Geeves, 1998) to occur during shortening to account for rapid repriming of  
420 the myosin power-stroke after a quick release, high power output during shortening and other  
421 phenomena. To the best of our knowledge interhead cooperativity has, however, not  
422 previously been observed experimentally under dynamic conditions in the presence of ATP.  
423 Our demonstration that binding of one myosin head increases the probability for binding of  
424 the second head is thus unique by demonstrating the potential for inter-head cooperativity  
425 where binding of one head increases the probability of binding of the second head to another.  
426 The demonstration for this potential is of interest despite the fact that the distance between  
427 neighboring, roughly parallel actin filaments in our study is appreciably larger than in the  
428 muscle sarcomere. On the other hand, the inter-filament distance in our experiments is not

429 very different from the next-neighbour inter-filament distance between actin filaments in the  
430 hexagonal arrangement of thin filaments that surround each thick filament in the sarcomere.  
431 In contrast to the inter-head cooperativity involving binding each of the HMM heads between  
432 two filaments, we did not study cooperativity of the double-head HMM binding to a filament  
433 (similar to in vitro motility or laser-trapping), due to the uncertainty to recognize the binding of  
434 specific HMM molecules in subsequent HS-AFM frames (Matusovsky et al., 2021).

435

### 436 **Cooperativity between myosin motors that involves activation of the thin filament**

437 Studies have shown that myosin binding to actin is required for full activation of the thin  
438 filament (McKillop and Geeves 1993, Smith & Geeves, 2003; Desai et al., 2015). When  
439 myosin binds to actin, it may directly affect the regulatory system by changing the  
440 conformation of Tm, such that other myosin heads can attach to thin filaments (Geeves &  
441 Holmes, 1999; Gordon, 2000; Smith et al., 2003). According to this model, with the transition  
442 from weak to strong actin–myosin binding, the myosin heads transfer Tm to an open state,  
443 making neighboring myosin binding sites on actin available for myosin binding. Our data are  
444 consistent with this model, as we observed that the binding of one motor to the activated thin  
445 filament (pCa 4.5) has changes the attachment kinetics of neighboring motors compared to  
446 non-activated thin filaments (pCa 9.0) in the blocked state or the bare actin filaments. Most  
447 specifically, when one motor is bound to the activated thin filament at the pCa 4.5, it moves  
448 the thin filament from the closed to the open state, which allows for further motor binding at  
449 nearby sites.

450

451 In a previous study, we showed that the interaction of HMM with cTFs caused a change in  
452 the thin filament conformation, both in the absence and presence of  $\text{Ca}^{2+}$ , and in the absence

453 and presence of different concentrations of ATP (Matusovsky et al., 2019). Our new data  
454 strengthen those findings and corroborate the idea that cooperativity of myosin heads in  
455 striated muscles is defined by thin filaments and their state of activation. We evaluated  
456 whether one head in a HMM molecule could activate the thin filament in the presence of ATP  
457 at low or high  $\text{Ca}^{2+}$  concentrations. Under non-activating conditions (presence of ATP, pCa  
458 9.0) when cTFs were in the blocked state, myosin heads were able to bind to cTFs but not  
459 able to switch the filaments from the blocked to the closed state, showing a similar decrease  
460 in the binding probability and fractional occupancy (Fig. 4e) when compared to the F-actin-  
461 HMM complex (Fig.3). Thus, binding of the two myosin heads are required for the transition  
462 of a thin filament from the blocked to the close state (Fig. 4). However, the situation is  
463 changed if myosin heads bind to cTFs under activation conditions (presence of ATP and pCa  
464 4.5), showing an increase in the probability of binding and the relative number of motors  
465 attached to thin filaments, as a result of a first myosin binding (Figs 3 and 4g, Movies S3, S4).  
466 These results suggest that one head (upper or lower heads of a given HMM molecule bound  
467 between two filaments) is able to switch a thin filament from the closed to the open state.

468

469 In addition to the cooperative phenomena considered above, our results also demonstrate  
470 higher affinity of myosin heads to the thin filaments in comparison to the actin filaments. This  
471 follows from the higher average number of the HMM heads bound ( $2.32 \pm 0.06$ ) to cTFs (Fig.  
472 4h) than to the non-regulated actin filaments ( $1.27 \pm 0.07$ ; Fig. 3f) and the slower decline in  
473 the total number of available heads in the former case. These findings are broadly consistent  
474 with previous observations that both tension and the average number of attached cross-  
475 bridges was increased in actin-reconstituted skinned muscle fibres after further reconstitution  
476 with thin filament regulatory proteins (Fujita et al, 2002).

477

478 To summarize, our data suggest that cooperativity between neighboring myosin molecule  
479 along a filament is primarily defined by the state of thin filament activation. In contrast, we find  
480 no evidence for cooperative effects attributed to allosteric changes along pure actin filaments.

481

482

## 483 **Materials and Methods**

### 484 **Proteins**

485 Native thin filaments were purified from rabbit right and left ventricular cardiac muscle that  
486 had been glycerinated and actin was purified from acetone powder of rabbit skeletal muscle  
487 (Sigma-Aldrich, USA), following a protocol previously used in our laboratory (Matusovsky et  
488 al., 2019). The double-headed skeletal myosin II was purified from rabbit psoas muscle and  
489 HMM fragments were prepared by proteolysis of the myosin with  $\alpha$ -chymotrypsin (Oakville,  
490 Ontario, Canada) as previously described (Cheng et al., 2019). Prior of the HS-AFM  
491 experiments, HMM, F-actin and thin filaments were tested for their functionality using *in-vitro*  
492 motility and  $Mg^{2+}$ -ATPase activity assays, as previously described (Matusovsky et al., 2019).

493

### 494 **The lipid bilayer template surface and experimental design**

495 The lipid composition for HS-AFM imaging contained 1,2-Dipalmitoyl-sn-glycero-3-  
496 phosphocholine (DPPC, Avanti Polar Lipids), 1,2-Dipalmitoyl-3-trimethylammonium-propane  
497 (DPTAP, Avanti Polar Lipids) and 1,2-dipalmitoyl-sn-glycero-3-phosphoethanolamine-N-(cap  
498 biotiny) (biotin-cap-DPPE, Avanti Polar Lipids). DPPC: DPTAP: biotin-cap-DPPE were mixed  
499 in a weight ratio of 89:10:1. The preparation of lipid vesicles and deposition on mica substrate

500 to form a mica-supported lipid bilayer surface (mica-SLB) has been previously described  
501 (Matusovsky et al., 2021).

502 The mica-SLB surface was rinsed with the buffer A, containing 25 mM KCl, 2 mM MgCl<sub>2</sub>,  
503 0.25 mM EGTA, 1.25 mM Imidazole-HCl, 0.5 mM DTT, (pH 7.0). Subsequently, 2.8 μl of  
504 either 7 μM non-regulated actin filaments or 1.0 μM regulated cTFs diluted in the buffer A  
505 were deposited on the mica-SLB surface and incubated for 10 minutes in a wet chamber. At  
506 these conditions, many filaments were attached to the surface in close proximity to each  
507 other. The distance distributions between two parallel non-regulated actin filaments and  
508 regulated cTFs are shown in Fig.S2. The observed distances were enough for binding the  
509 HMM heads between two parallel filaments, allowing counting of the exact number of HMM  
510 molecules at the given time of the experiment. We studied cooperativity of binding of the  
511 myosin heads in F-actin-HMM or cTF-HMM complexes using the following experimental  
512 conditions: i) nucleotide-free (NF) state; ii) presence of ATP analogs (ATP-γ-S); iii) presence  
513 of ATP and Ca<sup>2+</sup>.

514

### 515 **HS-AFM imaging of F-actin-HMM complex**

516 After rinsing unbound actin filaments with buffer A, 3.0 μl of 8 nM HMM diluted in buffer A  
517 was placed on top of non-regulated actin filaments on the mica-SLB surface, and incubated  
518 for an additional 3 minutes. The F-actin-HMM complex in nucleotide-free (NF) conditions was  
519 rinsed by 10 μl of buffer A, containing either NPE-caged ATP, non-caged ATP (0.5, 2 or 10  
520 μM) or 0.5 μM non-hydrolyzable ATP-γ-S. NPE-caged ATP (adenosine 5'-triphosphate, P3-  
521 (1-(2-nitrophenyl ethyl) ester) (Invitrogen) dissolved in attachment buffer was photolyzed in  
522 the AFM chamber using an UV light source at 340 nm. A delay of ~5-10 seconds was found  
523 after activation of caged ATP, likely because caged ATP molecules were in solution and

524 required this time to attach to and get hydrolyzed in the motor domain of HMM. To ensure  
525 nucleotide free conditions 1 U/ $\mu$ l of apyrase was added to the solution. Further, 1 U/ml of  
526 hexokinase and 10 mM glucose were added to the ADP solutions to remove contaminating  
527 ATP. The F-actin-HMM complex was formed on the mica-SLB surface in the buffer A with  
528 low (pCa 9.0) or high (pCa 4.5)  $\text{Ca}^{2+}$  concentrations to ensure similar experimental conditions  
529 as for cTFs-HMM complex.

530

### 531 **HS-AFM imaging of cTFs-HMM complex**

532 The procedure for imaging the cTFs-HMM complex was similar to that explained above for  
533 non-regulated actin filaments. Imaging of the cTFs-HMM complex at low  $\text{Ca}^{2+}$  (pCa 9.0) or  
534 high  $\text{Ca}^{2+}$  (pCa 4.5) concentrations, using skeletal muscle HMM was performed in the  
535 following way: 2-20  $\mu$ L of TFs (1  $\mu$ M) in the buffer A (relaxing conditions, absence of  $\text{Ca}^{2+}$ )  
536 were placed on a mica-SLB surface for 10 min in the wet chamber and unbound cTFs were  
537 removed by exchanging for the buffer B, containing low or high  $\text{Ca}^{2+}$  concentrations. Then,  
538 3.0  $\mu$ L of skeletal muscle HMM (8 nM) in buffer A was placed on top of the mica-SLB surface  
539 with bound cTFs for 10 min in the wet chamber. Unbound HMM was washed out by buffer A  
540 followed by washing several times with appropriate buffer B with low or high  $\text{Ca}^{2+}$   
541 concentrations containing 0.5-2  $\mu$ M of caged or non-caged ATP as desired.

542

### 543 **Probability of binding, fractional occupancies and cooperativity analysis**

544 Probability of the HMM heads binding to the non-regulated or regulated actin filaments was  
545 calculated by binomial distribution evaluated in HS-AFM experiments. This assumes that the  
546 binding situation in each frame is treated as an independent event because each myosin  
547 head is assumed to undergo independent cycling (possibly several times per frame). The



548 bound and unbound events (0 – no binding, 1 – binding) were visualized directly to compute  
549 probabilities for the binding-unbinding process as a ratio of the binding events to the total  
550 number of events in each independent frame. Our experimental design allows to visualize 4-6  
551 HMM molecules (or 8-12 individual heads) bound between two filaments. Two typical  
552 scanning views and rates were used:  $150 \times 75 \text{ nm}^2$  ( $80 \times 40 \text{ pixels}^2$ ) at the 6.7-10 frame per  
553 second (fps) and  $200 \times 200 \text{ nm}^2$  ( $120 \times 120 \text{ pixels}^2$ ) at the 2 fps.

554

555 Fractional Occupancy ( $\theta$ ) is the ratio of the actin-binding sites occupied by HMM heads to the  
556 total number of the actin binding sites experimentally observed in the given time of the  
557 experiment and calculated from:

558

$$559 \quad \theta = \frac{[\text{bound sites}]}{[\text{bound sites}] + [\text{unbound sites}]}$$

560 Cooperative probability which is related to the probability of binding was calculated from:

561

$$562 \quad C = \binom{n}{k} p^k (1 - p)^{n-k}$$

563 where C denotes cooperative probability of binding, n = number of total events or subsequent  
564 frames of the experiment; k = number of binding events in the experiment, p = probability of  
565 binding, 1-p = probability of unbinding and  $\binom{n}{k}$  represents the combination of the total and  
566 binding events expressed as:  $\frac{n!}{k!(n-k)!}$ .

567

568 The events for each myosin head calculated from the reference frame, *i.e.* a moment when  
569 the head was bound to the filament until the end of image acquisition. The total events

570 included both binding events (head was bound to actin filament) and unbinding events (head  
571 was unbind from actin filament).

572

### 573 **Analysis of the myosin displacements**

574 To analyze the HMM displacement, each of the HMM heads bound between two parallel non-  
575 regulated or regulated actin filaments were tracked individually in successive HS-AFM  
576 frames. The tracked parameters included the height of the HMM head used for subsequent  
577 determination of the center of mass (COM) in each myosin head. The height of the HMM  
578 heads was determined in semi-automatic mode using the  $x$ ,  $y$ , and  $z$  data of the HS-AFM  
579 frames in Kodec software (v. 4.4.7.39) (Ngo et al., 2015). The  $x$  and  $y$  data correspond to the  
580 lateral coordinates, while the observed  $z$  values correspond to the highest point in the center  
581 of the HMM heads. To obtain the  $z$  values for the highest point in HMM head(s) the image  
582 was automatically searched within a  $5 \times 5$  pixels area. Next, the obtained height values and  
583  $x$ ,  $y$  positions within the  $5 \times 5$  pixels area were used to automatically calculate the COM. To  
584 obtain the accurate COM values, the height of the surface outside of the actin-HMM position  
585 was subtracted from the average COM of the HMM heads. The displacement size was  
586 calculated as a difference in the COM position of HMM head in the reference frame and the  
587 next frame, in successive HS-AFM frames. The forward and backward displacements were  
588 calculated for each myosin head, plotted and fitted by sum of two Gaussians. The  
589 displacement size of the upper and lower HMM heads did not differ between each other,  
590 although the frequency and binding events were not correlated between two heads within one  
591 HMM molecule. The displacement size was also not affected by the range of the ATP  
592 concentrations used in our experiments (0.2  $\mu\text{M}$ , 0.5  $\mu\text{M}$ , 2  $\mu\text{M}$ , 10  $\mu\text{M}$ ), thus we averaged the

593 data with the sampling rate of 589 events for the non-regulated actin filaments and 911  
594 events for the regulated cTFs.

595

### 596 **Cross-sectional analysis**

597 Cross-sectional analysis was performed by Kodec software (Ngo et al., 2015) to calculate the  
598 distance between two filaments (Fig. S2).

### 599 **HS-AFM system and cantilevers**

600 The experiments were performed on a tapping-mode HS-AFM system (RIBM) (Ando et al.,  
601 2001), equipped with an additional UV laser. Olympus cantilevers BL-AC10DS-A2 with the  
602 following parameters were used: spring constant 0.08-0.15 N/m; quality factor in water ~1.4-  
603 1.6; resonance frequency in water 0.6-1.2 MHz. The additional carbon probe tip was  
604 fabricated on the tip of a cantilever by electron-beam deposition and sharpened by plasma  
605 etcher, giving a ~4 nm tip apex. The tip-sample loading force can be modulated and  
606 decreased by the free oscillation peak-to-peak amplitude ( $A_0$ ) of the cantilever set to ~2.0 nm  
607 and the amplitude set point adjusted to more than 0.9  $A_0$ .

608

### 609 **Data analysis and processing of HS-AFM images**

610 To remove spike noise and to make the  $xy$ -plane flat, the HS-AFM images were processed  
611 with low-pass filtering using Kodec software (4.4.7.39). The COM and cross-correlation  
612 analyses were performed in Kodec software. Fittings of equations to the observed data were  
613 performed in GraphPad Prism software (v.9.3.0). Values are reported as mean  $\pm$  Standard  
614 Deviation or 95% Confidential Intervals throughout the paper as indicated. Number of  $n$   
615 equals to independent experiments. A level of significance of  $p < 0.05$  was used for all  
616 analyses.

617

618 **Data availability**

619 All data required for evaluation of the conclusions in the paper are present in the main body  
620 of the paper and/or in the Supporting Information.

621

622 **Acknowledgments**

623 This work was supported by the Natural Science and Engineering Research Council of  
624 Canada (to D.E.R). A.M. was supported by the Swedish Research Council (grant number  
625 2019-03456). D.E.R. is a Canada Research Chair in Muscle Biophysics. We thank Dr. Y.-S.  
626 Cheng for the HMM preparation.

627

628 **Author contributions**

629 O.S.M. and D.E.R. designed research; O.S.M. performed HS-AFM experiments and all  
630 authors were involved in analysis and interpretation of the data. O.S.M., A.M., D.E.R. wrote  
631 the paper and all authors approved the final version of the manuscript.

632

633 **Ethics declarations**

634 Competing interests

635 The authors declare no competing interests.

636 **References**

- 637 Rayment, I. et al. Three-dimensional structure of myosin subfragment-1: a molecular motor.  
638 *Science* 261, 50-58 (1993).
- 639 Fisher, A. J. et al. Structural studies of myosin:nucleotide complexes: a revised model for the  
640 molecular basis of muscle contraction. *Biophys.J.* 68, 19S-26S (1995).
- 641 Mansson, A., Usaj, M., Moretto, L. & Rassier, D. E. Do actomyosin single-molecule  
642 mechanics data predict mechanics of contracting muscle? *Int.J.Mol.Sci.* 19, 1863 (2018).
- 643 Robert-Paganin, J., Pylypenko, O., Kikuti, C., Sweeney, H. L. & Houdusse, A. Force  
644 generation by myosin motors: A structural perspective. *Chem.Rev.* 120, 5-35 (2020).
- 645 Finer, J. T., Simmons, R. M. & Spudich, J. A. Single myosin molecule mechanics: piconewton  
646 forces and nanometre steps. *Nature* 368, 113-119 (1994).
- 647 Ishijima, A. et al. Single-molecule analysis of the actomyosin motor using nano-manipulation.  
648 *Biochem.Biophys.Res.Commun.* 199, 1057-1063 (1994).
- 649 Yanagida, T. & Ishijima, A. Forces and steps generated by single myosin molecules.  
650 *Biophys.J.* 68, 312S-318S (1995).
- 651 Kaya, M. & Higuchi, H. Nonlinear elasticity and an 8-nm working stroke of single myosin  
652 molecules in myofilaments. *Science* 329, 686-689 (2010).
- 653 Kaya, M., Tani, Y., Washio, T., Hisada, T. & Higuchi, H. Coordinated force generation of  
654 skeletal myosins in myofilaments through motor coupling. *Nat.Comm.* 8, 16036 (2017).
- 655 Pertici, I. et al. A myosin II nanomachine mimicking the striated muscle. *Nat.Comm.* 9,  
656 3532 (2018).
- 657 Cheng, Y. S., Matusovskiy, O. S. & Rassier, D. E. Cleavage of loops 1 and 2 in skeletal  
658 muscle heavy meromyosin (HMM) leads to a decreased function. *Arch.Biochem.Biophys.*  
659 661, 168-177 (2019).
- 660 Cheng, Y. S., de Souza Leite, F. & Rassier, D. E. The load dependence and the force-  
661 velocity relation in intact myosin filaments from skeletal and smooth muscles.  
662 *Am.J.Physiol.Cell Physiol.* 318, C103-C110 (2020).
- 663 Howard, J. Molecular motors: structural adaptations to cellular functions. *Nature* 389, 561-  
664 567 (1997).
- 665 Debold, E. P., Patlak, J. B. & Warshaw, D. M. Slip sliding away: load-dependence of velocity  
666 generated by skeletal muscle myosin molecules in the laser trap. *Biophys.J.* 89, L34-L36  
667 (2005).

668 Lowey, S. et al. Hypertrophic cardiomyopathy R403Q mutation in rabbit beta-myosin reduces  
669 contractile function at the molecular and myofibrillar levels. *Proc.Natl.Acad.Sci.USA* 115,  
670 11238-11243 (2018).

671 Edman, K. A. & Hwang, J. C. The force-velocity relationship in vertebrate muscle fibres at  
672 varied tonicity of the extracellular medium. *J.Physiol.* 269, 255-272 (1977).

673 Mansson, A. Comparing models with one versus multiple myosin-binding sites per actin  
674 target zone: The power of simplicity. *J.Gen.Physiol.* 151, 578-592 (2019).

675 Capitano, M. et al. Ultrafast force-clamp spectroscopy of single molecules reveals load  
676 dependence of myosin working stroke. *Nat.Methods* 9, 1013-1019 (2012).

677 Sung, J. et al. Harmonic force spectroscopy measures load-dependent kinetics of individual  
678 human beta-cardiac myosin molecules. *Nat.Comm.* 6, 7931 (2015).

679 Huxley, A. F. Muscle structure and theories of contraction. *Prog.Biophys.Biophys.Chem.* 7,  
680 255-318 (1957).

681 Huxley, A. F. & Tideswell, S. Rapid regeneration of power stroke in contracting muscle by  
682 attachment of second myosin head. *J Muscle Res Cell Motil.* 18, 111-114 (1997).

683 Brunello, E. et al. Skeletal muscle resists stretch by rapid binding of the second motor domain  
684 of myosin to actin. *Proc.Natl.Acad.Sci.USA* 104, 20114-9 (2007).

685 Caremani, M., Melli, L., Dolfi, M., Lombardi, V., Linari, M. The working stroke of the myosin II  
686 motor in muscle is not tightly coupled to release of orthophosphate from its active site. *J*  
687 *Physiol.* 591, 5187-5205 (2013).

688 Rahman, M. A., Usaj, M., Rassier, D. E. & Mansson, A. Blebbistatin effects expose hidden  
689 secrets in the force-generating cycle of actin and myosin. *Biophys.J.* 115, 386-397 (2018).

690 Irving, M., Lombardi, V., Piazzesi, G. & Ferenczi, M. A. Myosin head movements are  
691 synchronous with the elementary force-generating process in muscle. *Nature* 357, 156-158  
692 (1992).

693 Linari, M. et al. Force generation by skeletal muscle is controlled by mechanosensing in  
694 myosin filaments. *Nature* 528, 276-279 (2015).

695 Orlova, A. & Egelman, E. H. A conformational change in the actin subunit can change the  
696 flexibility of the actin filament. *J.Mol.Biol.* 232, 334-341 (1993).

697 Tokuraku, K., Kurogi, R., Toya, R. & Uyeda, T. Q. Novel mode of cooperative binding  
698 between myosin and Mg<sup>2+</sup>-actin filaments in the presence of low concentrations of ATP.  
699 *J.Mol.Biol.* 386, 149-162 (2009).

700 Prochniewicz, E. et al. Myosin isoform determines the conformational dynamics and  
701 cooperativity of actin filaments in the strongly bound actomyosin complex. *J.Mol.Biol.* 396,  
702 501-509 (2010).

703 Gordon, A. M., Homsher, E. & Regnier, M. Regulation of contraction in striated muscle.  
704 *Physiol.Rev.* 80, 853-924 (2000).

705 Galinska-Rakoczy, A. et al. Structural basis for the regulation of muscle contraction by  
706 troponin and tropomyosin. *J.Mol.Biol.* 379, 929-935 (2008).

707 Lehman, W., Galinska-Rakoczy, A., Hatch, V., Tobacman, L. S. & Craig, R. Structural basis  
708 for the activation of muscle contraction by troponin and tropomyosin. *J.Mol.Biol.* 388, 673-681  
709 (2009).

710 Matusovsky, O. S., Mansson, A., Persson, M., Cheng, Y. S. & Rassier, D. E. High-speed  
711 AFM reveals subsecond dynamics of cardiac thin filaments upon Ca<sup>2+</sup> activation and heavy  
712 meromyosin binding. *Proc.Natl.Acad.Sci.USA* 116, 16384-16393 (2019).

713 McKillop, D. F. & Geeves, M. Regulation of the interaction between actin and myosin  
714 subfragment 1: evidence for three states of the thin filament. *Biophys.J.* 65, 693-701 (1993).

715 Smith, D. A. & Geeves, M. A. Cooperative regulation of myosin-actin interactions by a  
716 continuous flexible chain II: actin-tropomyosin-troponin and regulation by calcium. *Biophys.J.*  
717 84, 3168-3180 (2003).

718 Desai, R., Geeves, M. A. & Kad, N. M. Using fluorescent myosin to directly visualize  
719 cooperative activation of thin filaments. *J.Biol.Chem.* 290, 1915-1925 (2015).

720 Geeves, M. A. & Holmes, K. C. Structural mechanism of muscle contraction.  
721 *Annu.Rev.Biochem.* 68, 687-728 (1999).

722 Kodera, N. et al. Structural and dynamics analysis of intrinsically disordered proteins by high-  
723 speed atomic force microscopy *Nat Nanotechnol.* 16, 181-189 (2021).

724 Heath, G. & Scheuring, S. High-speed AFM height spectroscopy reveals  $\mu$ s-dynamics of  
725 unlabeled biomolecules. *Nat Commun.* 9, 4983 (2018).

726 Matusovsky, O. S. et al. Millisecond conformational dynamics of skeletal myosin II power  
727 stroke studied by high-speed atomic force microscopy. *ACS Nano* 15, 2229-2239 (2021).

728 Steffen, W., Smith, D., Simmons, R., Sleep, J. Mapping the actin filament with myosin.  
729 *Proc.Natl.Acad.Sci.USA* 96, 14949-14954 (2001).

730 Wang, Z. et al. The molecular basis for sarcomere organization in vertebrate skeletal muscle.  
731 *Cell* 184, 2135-2150 (2021).

- 732 Amyot, R. & Flechsig, H. BioAFMviewer: An interactive interface for simulated AFM scanning  
733 of biomolecular structures and dynamics. *PLoS Comput Biol.* 16, e1008444 (2020).
- 734 Capitanio, M. et al. Two independent mechanical events in the interaction cycle of skeletal  
735 muscle myosin with actin. *Proc.Natl.Acad.Sci.USA* 103, 87-92 (2006).
- 736 Geeves, M. A., Fedorov, R. & Manstein, D. J. Molecular mechanism of actomyosin-based  
737 motility. *Cell Mol.Life Sci.* 62, 1462-1477 (2005).
- 738 Tyska, M. J. et al. Two heads of myosin are better than one for generating force and motion.  
739 *Proc.Natl.Acad.Sci.USA* 96, 4402-4407 (1999).
- 740 Piazzesi, G., Lucii, L. & Lombardi, V. The size and the speed of the working stroke of muscle  
741 myosin and its dependence on the force. *J.Physiol.* 545, 145-151 (2002).
- 742 Ngo, K. X., Kodera, N., Katayama, E., Ando, T., Uyeda, T. Q. Cofilin-induced unidirectional  
743 cooperative conformational changes in actin filaments revealed by high-speed atomic force  
744 microscopy. *eLife* 4, e04806 (2015).
- 745 Risi, C.M. et al. Ca<sup>2+</sup>-induced movement of tropomyosin on native cardiac thin filaments  
746 revealed by cryoelectron microscopy. *Proc.Natl.Acad.Sci.USA* 114, 6782–6787 (2017).
- 747 Risi, C. M. et al. The structure of the native cardiac thin filament at systolic Ca<sup>2+</sup> levels.  
748 *Proc.Natl.Acad.Sci.USA* 118, e2024288118 (2021).
- 749 Vilfan, A. & Duke, T. Instabilities in the transient response of muscle. *Biophys.J.* 85, 818-827  
750 (2003).
- 751 Hilbert, L., Cumarasamy, S., Zitouni, N. B., Mackey, M. C., Lauzon, A.-M. The kinetics of  
752 mechanically coupled myosins exhibit group size-dependent regimes. *Biophys.J.* 105, 1466-  
753 1474 (2013).
- 754 Hwang, Y., Washio, T., Hisada, T., Higuchi, Kaya, M. A reverse stroke characterizes the  
755 force generation of cardiac myofilaments, leading to an understanding of heart function.  
756 *Proc.Natl.Acad.Sci.USA* 118, e2011659118 (2021).
- 757 Duke, T. A. Molecular model of muscle contraction. *Proc.Natl.Acad.Sci.USA* 96, 2770-2775  
758 (1999).
- 759 Mansson, A. Hypothesis: single actomyosin properties account for ensemble behavior in  
760 active muscle shortening and isometric contraction. *Int.J.Mol.Sci.* 21, 8399 (2020).
- 761 Huxley, A. Muscular contraction. *Ann.Rev.Physiol.* 50, 1-16 (1988).
- 762 Hill, T. L. Theoretical formalism for the sliding filament model of contraction of striated  
763 muscle. Part I. *Prog.Biophys.Mol.Biol.* 28, 267-340 (1974).



764 Edman, K. A., Mansson, A., Caputo, C. The biphasic force-velocity relationship in frog muscle  
765 fibres and its evaluation in terms of cross-bridge function. *J.Physiol.* 503, 141-156 (1997).  
766 Conibear, P. B., Geeves, M. Cooperativity between the two heads of rabbit skeletal muscle  
767 heavy meromyosin in binding to actin. *Biophys. J.* 75, 926-937 (1998)  
768 Fujita, H., Sasaki, D., Ishiwata S., Kawai, M. Elementary steps of the cross-bridge cycle in  
769 bovine myocardium with and without regulatory proteins. *Biophys.J.* 82, 915-928 (2002).  
770 Ando, T. et al. High-speed atomic force microscope for studying biological macromolecules.  
771 *Proc.Natl.Acad.Sci.USA* 98, 12468–12472 (2001).  
772  
773

1  
2  
3  
4  
5  
6  
7  
8  
9  
10  
11  
12  
13  
14  
15  
16  
17  
18  
19  
20  
21  
22  
23  
24  
25  
26  
27

Supplementary

**Cooperativity of myosin II motors in the non-regulated and regulated thin filaments investigated with high-speed AFM**

Oleg S. Matusovsky<sup>1</sup>

Alf Mansson<sup>2</sup>

Dilson E. Rassier<sup>1\*</sup>

<sup>1</sup> Department of Kinesiology and Physical Education, McGill University, Canada

<sup>2</sup> Department of Chemistry and Biomedical Sciences, Linnaeus University, Kalmar, Sweden.

**Supplementary file includes:**

Figures S1 to S7

Supplementary Table S1

Captions for Movies S1 to S4

**Other Supplementary Materials for this manuscript include the following:**

Movies S1 to S4

28 **Supplementary Figures**

29

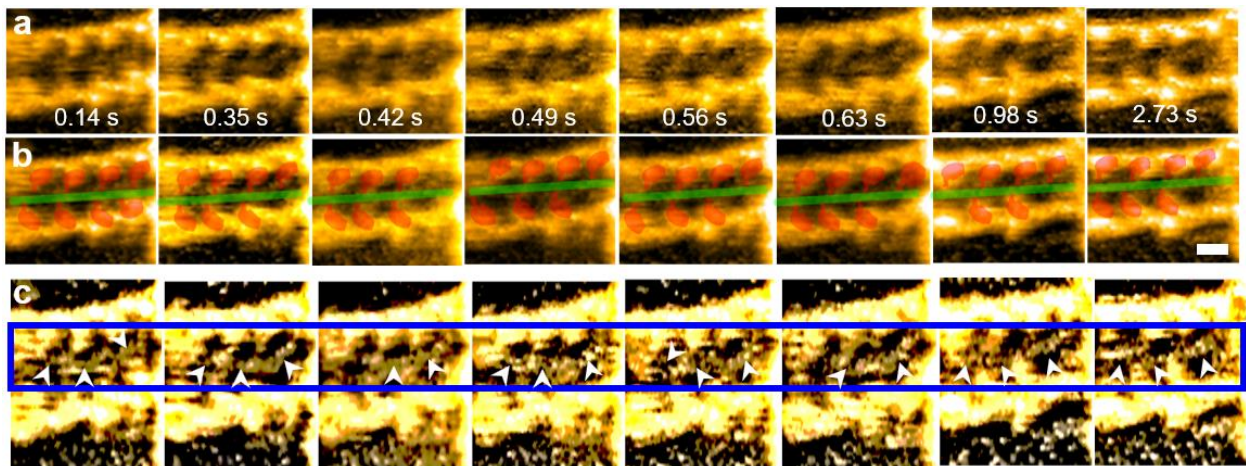

30

31 **Figure S1. Successive HS-AFM images of F-actin-HMM complex in the presence of 0.2**  
32  **$\mu\text{M}$  ATP. (a)** Double-headed heavy meromyosin (HMM) motors bound between two actin  
33 filaments in  $\sim 37$  nm distance to form a stable structure with up to eight individual myosin  
34 heads (four HMM molecules), attached by their S2 regions. **(b)** HMM heads between two  
35 actin filaments highlighted by red colors, S2 region of the HMM molecules highlighted by  
36 green color. **(c)** high contrast images from (a) panel to highlight the connected S2 regions  
37 between HMM molecules. Numbers indicate the time in seconds, the scan rate: 14.4 fps,  
38 scale bar: 30 nm.

39

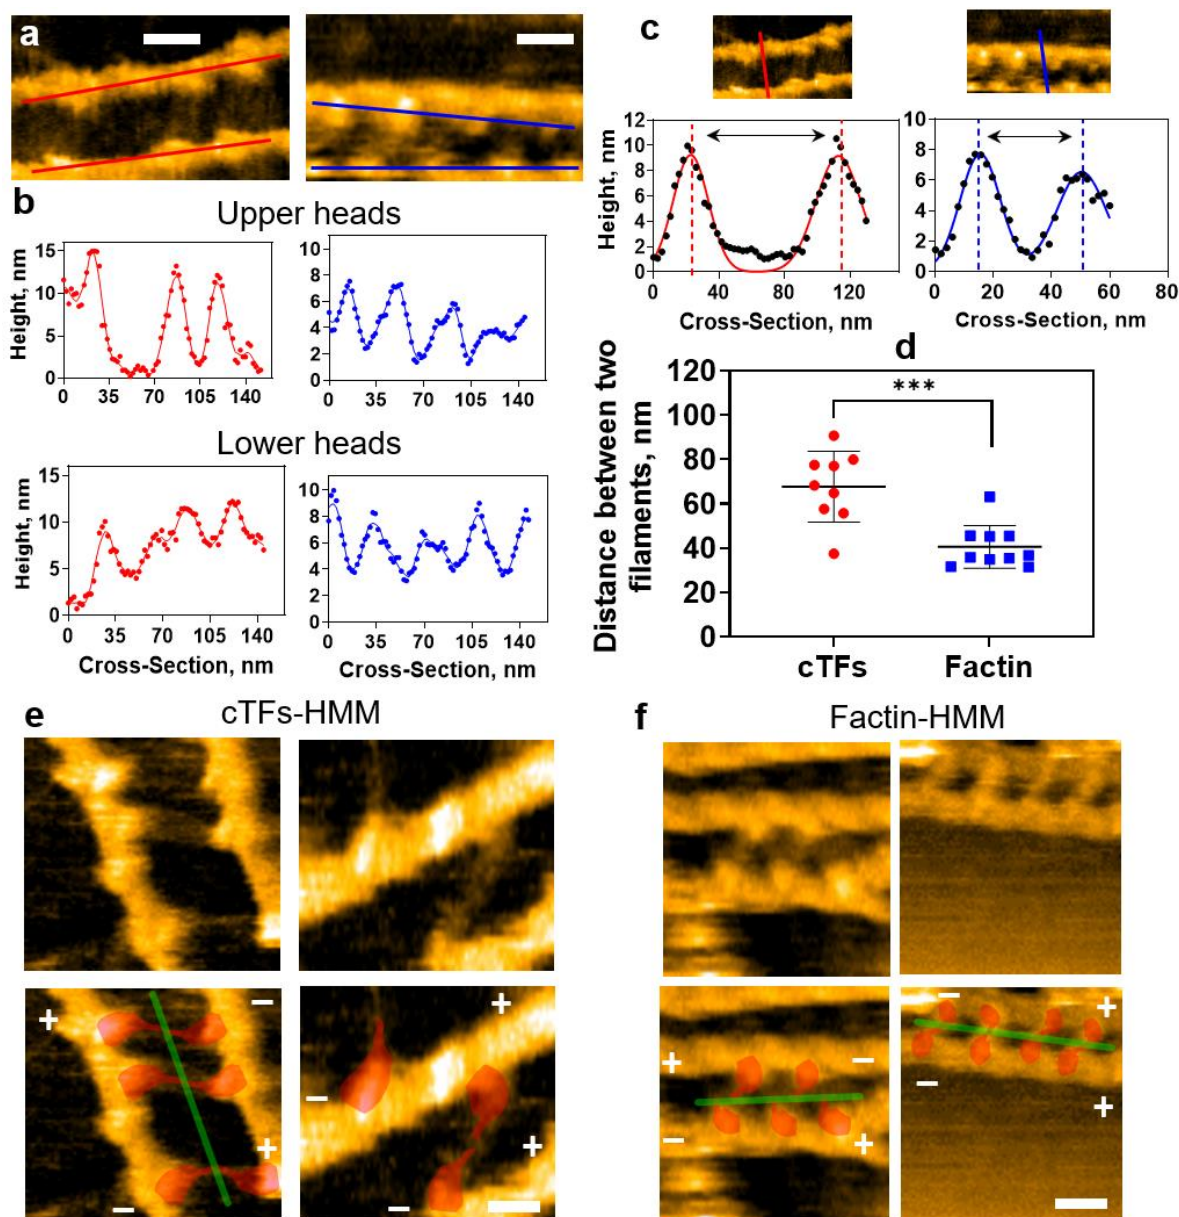

40

41 **Figure S2. Arrangement of myosin heads between two parallel filaments.** (a-b) Cross-  
 42 sections of myosin upper and lower heads bound between two parallel cTFs (left, red profiles)  
 43 and F-actin (right, blue profiles), scale bars: 30 nm. (c) The measured distance between two  
 44 parallel cTFs (left) and F-actin (right) averaged in (d). The difference in distance between non-  
 45 regulated F-actin and regulated cTFs ( $p=0.001$ , unpaired t-test) did not affect the HMM binding  
 46 and displacement analysis (Figs 1f and 2c). (e-f) Two types of HMM binding between parallel  
 47 cTFs or actin filaments were observed: the upper and lower heads bound towards the similar  
 48 direction (right HS-AFM images in e-f) or the upper and lower heads bound towards the  
 49 opposite directions (left HS-AFM images in e-f). The captured snapshots in left e and left f  
 50 panels indicate the rare situation occurred due to head displacement on the filament in the  
 51 presence of ATP. HMM heads between two actin filaments highlighted by red colors, S2 region  
 52 of the HMM molecules highlighted by green color. The corresponding polarity of the filaments is  
 53 shown. Scale bars: 30 nm.

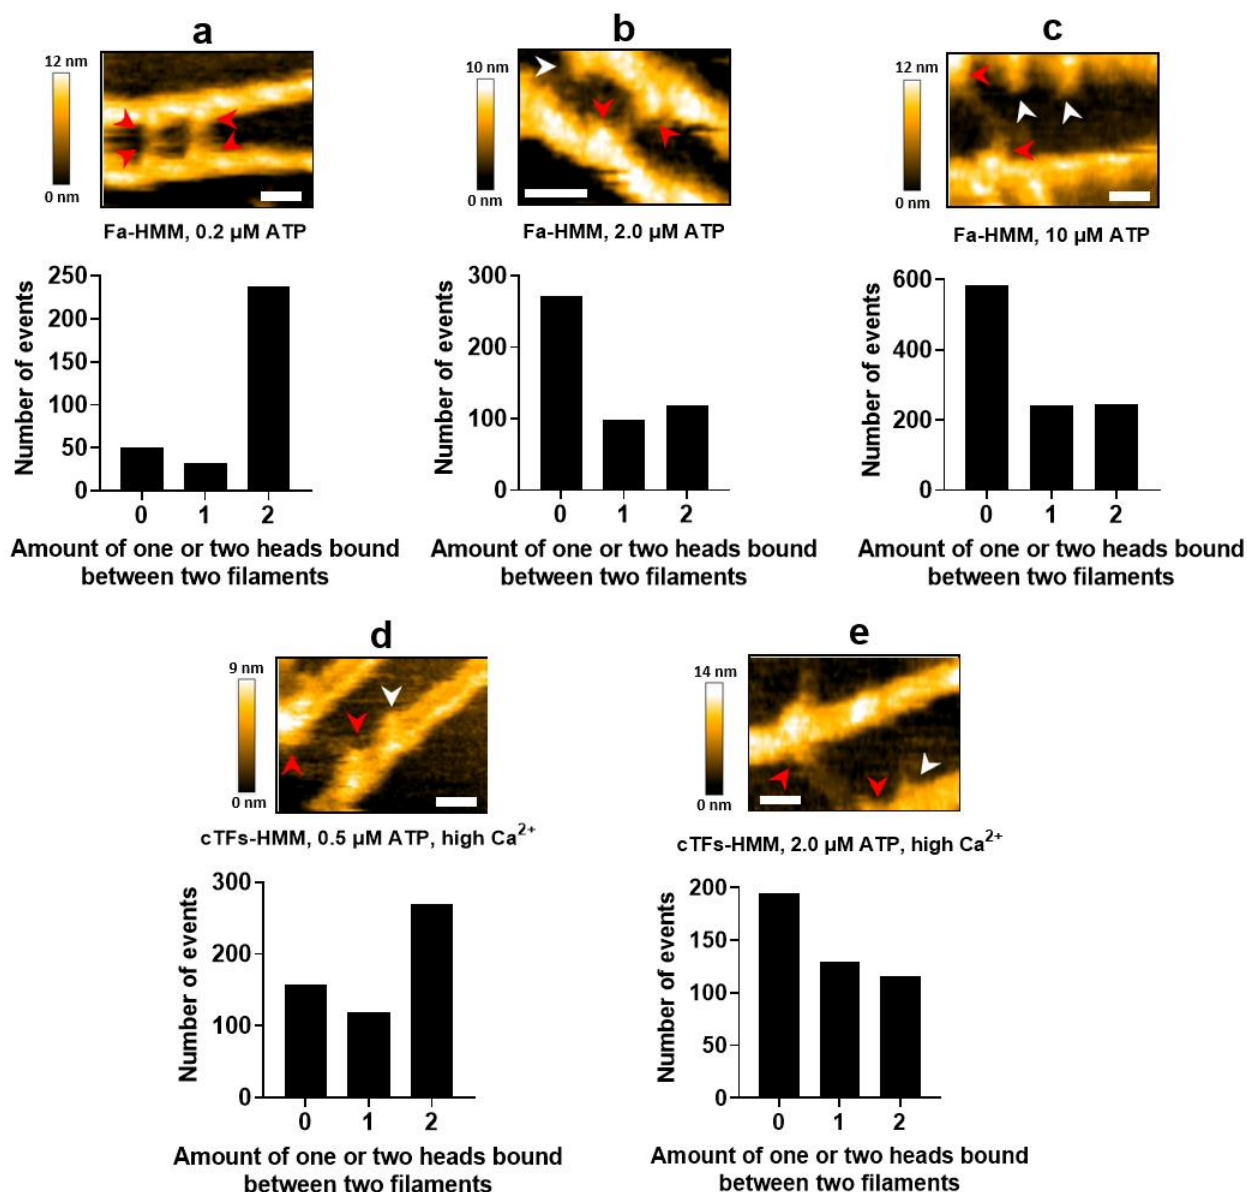

54

55 **Figure S3. Frequency distribution of one HMM head or two HMM heads bound between**  
 56 **two filaments in the presence of ATP. (a-c)** Distribution of one (1) and two (2) HMM heads in  
 57 Fa-HMM complex in the presence of 0.2  $\mu\text{M}$  ATP (319 binding events), 2.0  $\mu\text{M}$  ATP (488  
 58 binding events) or 10  $\mu\text{M}$  ATP (1072 binding events); **(d-e)** Distribution of one (1) and two (2)  
 59 HMM heads in cTFs-HMM complex in the presence of 0.5  $\mu\text{M}$  ATP, high  $\text{Ca}^{2+}$  concentration  
 60 (545 binding events) and 2.0  $\mu\text{M}$  ATP high  $\text{Ca}^{2+}$  concentration (440 binding events). The zero  
 61 indicates the temporarily no bindings of HMM heads along the length of the filaments in  
 62 analyzed datasets. HMM heads are indicated by white arrows (one head bound) and red arrows  
 63 (two heads bound). Scale bars: 30 nm; z-scales indicated for each HS-AFM image.

64

65

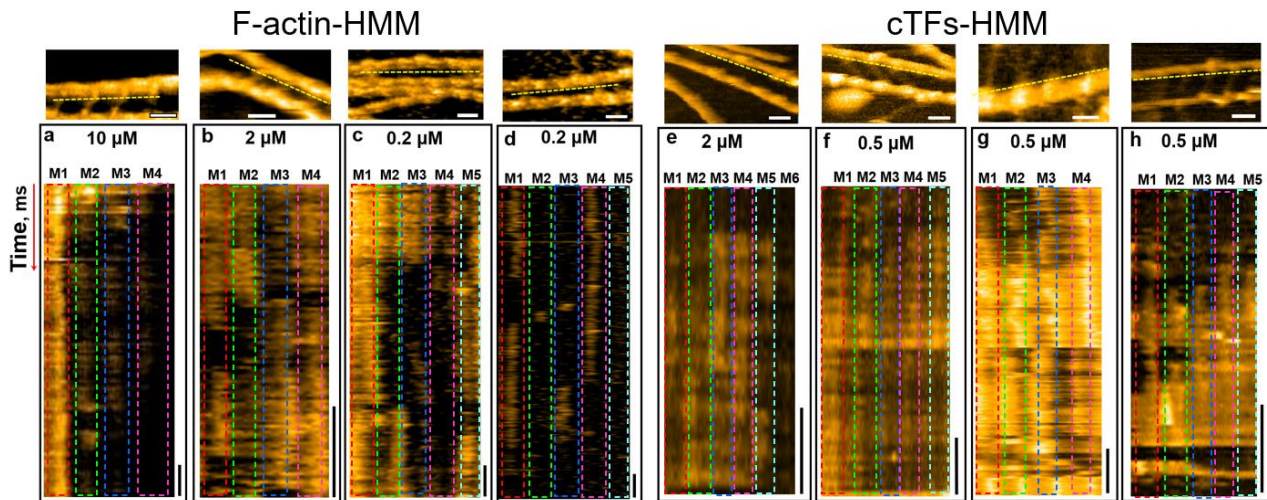

66

67

68 **Figure S4. Kymograph images of the F-actin-HMM (a-d) and cTFs-HMM (e-h) complexes**  
69 **at the different ATP concentrations.** Scan area and scan rates of the top HS-AFM images for  
70 F-actin-HMM complex: (a)  $150 \times 75 \text{ nm}^2$ ,  $80 \times 40 \text{ pixels}^2$ , 10 fps; (b)  $150 \times 90 \text{ nm}^2$ ,  $80 \times 48$   
71  $\text{pixels}^2$ , 20 fps; (c)  $200 \times 120 \text{ nm}^2$ ,  $80 \times 40 \text{ pixels}^2$ , 10 fps; (d)  $200 \times 120 \text{ nm}^2$ ,  $80 \times 40 \text{ pixels}^2$ ,  
72 12.5 fps. The horizontal scale bars: 30 nm; the vertical scale bars in kymographs: 20 ms. Scan  
73 area and scan rates of the top HS-AFM images for cTFs-HMM complex at the activating  
74 conditions: (e)  $120 \times 120 \text{ nm}^2$ ,  $200 \times 200 \text{ pixels}^2$ , 6.7 fps; (f)  $120 \times 120 \text{ nm}^2$ ,  $200 \times 200 \text{ pixels}^2$ , 2  
75 fps; (g)  $150 \times 75 \text{ nm}^2$ ,  $80 \times 40 \text{ pixels}^2$ , 6.7 fps; (h)  $200 \times 200 \text{ nm}^2$ ,  $120 \times 120 \text{ pixels}^2$ , 2 fps. The  
76 horizontal scale bars: 30 nm; the vertical scale bars in kymographs: 50 ms (e-f) and 100 ms (g-  
77 h). The dashed yellow line indicated the initial position to create a kymograph image. (i) Average  
78 dwell-time of myosin heads in F-actin-HMM complex in the presence of  $0.5 \mu\text{M}$  ATP ( $n=3$ , 101  
79 events,  $\sim 10$  HMM heads) and  $2 \mu\text{M}$  ATP ( $n=4$ , 592 events,  $\sim 20$  HMM heads). (j). Average  
80 dwell-time of myosin heads in cTFs-HMM complex in the presence of  $0.5 \mu\text{M}$  ATP ( $n=3$ , 825  
81 events,  $\sim 10$  HMM heads) and  $2 \mu\text{M}$  ATP ( $n=3$ , 498 events,  $\sim 10$  HMM heads).

82

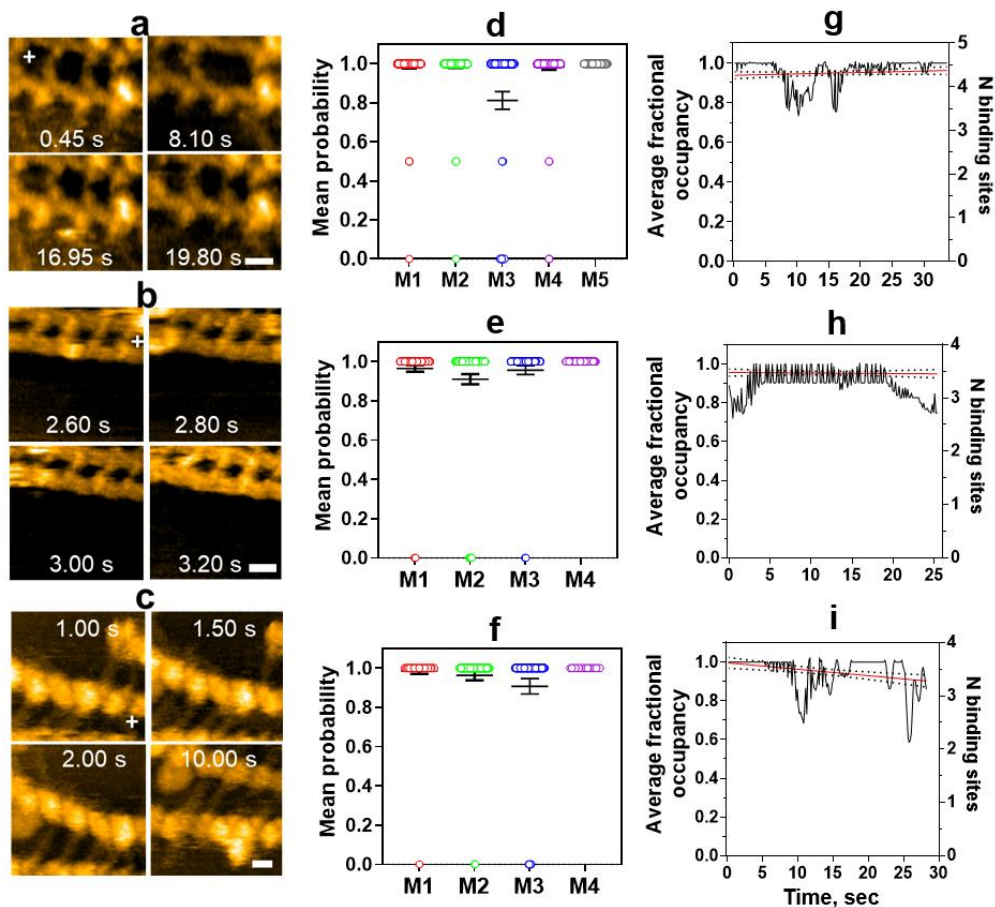

83

84 **Figure S5. Probability of binding of myosin heads to the non-regulated or regulated**  
 85 **filaments in rigor conditions or in the presence of ATP- $\gamma$ -S.** (a-c) HS-AFM images of HMM  
 86 molecules bound between two actin filaments in the presence of ATP- $\gamma$ -S (a), HMM molecules  
 87 bound between two actin filaments in the absence of  $\text{Ca}^{2+}$  and ATP (b) and HMM molecules  
 88 bound between two cardiac thin filaments in the absence of  $\text{Ca}^{2+}$  and ATP (c). Scale bars: 30  
 89 nm (d-f) Probabilities of binding of the HMM heads in the F-actin-HMM complex in the presence  
 90 of ATP- $\gamma$ -S (d, 1145 events), in the absence of  $\text{Ca}^{2+}$  and ATP (e, 1408 events) and in the cTFs-  
 91 HMM complex in the absence of  $\text{Ca}^{2+}$  and ATP (f, number of events 663). Individual data points  
 92 are shown for each HMM molecules (M1-M4) as mean values  $\pm$  95% CI, n=3. (g-i)  
 93 Corresponded fractional occupancies of the binding sites by HMM heads for the conditions  
 94 shown in d-f.

95

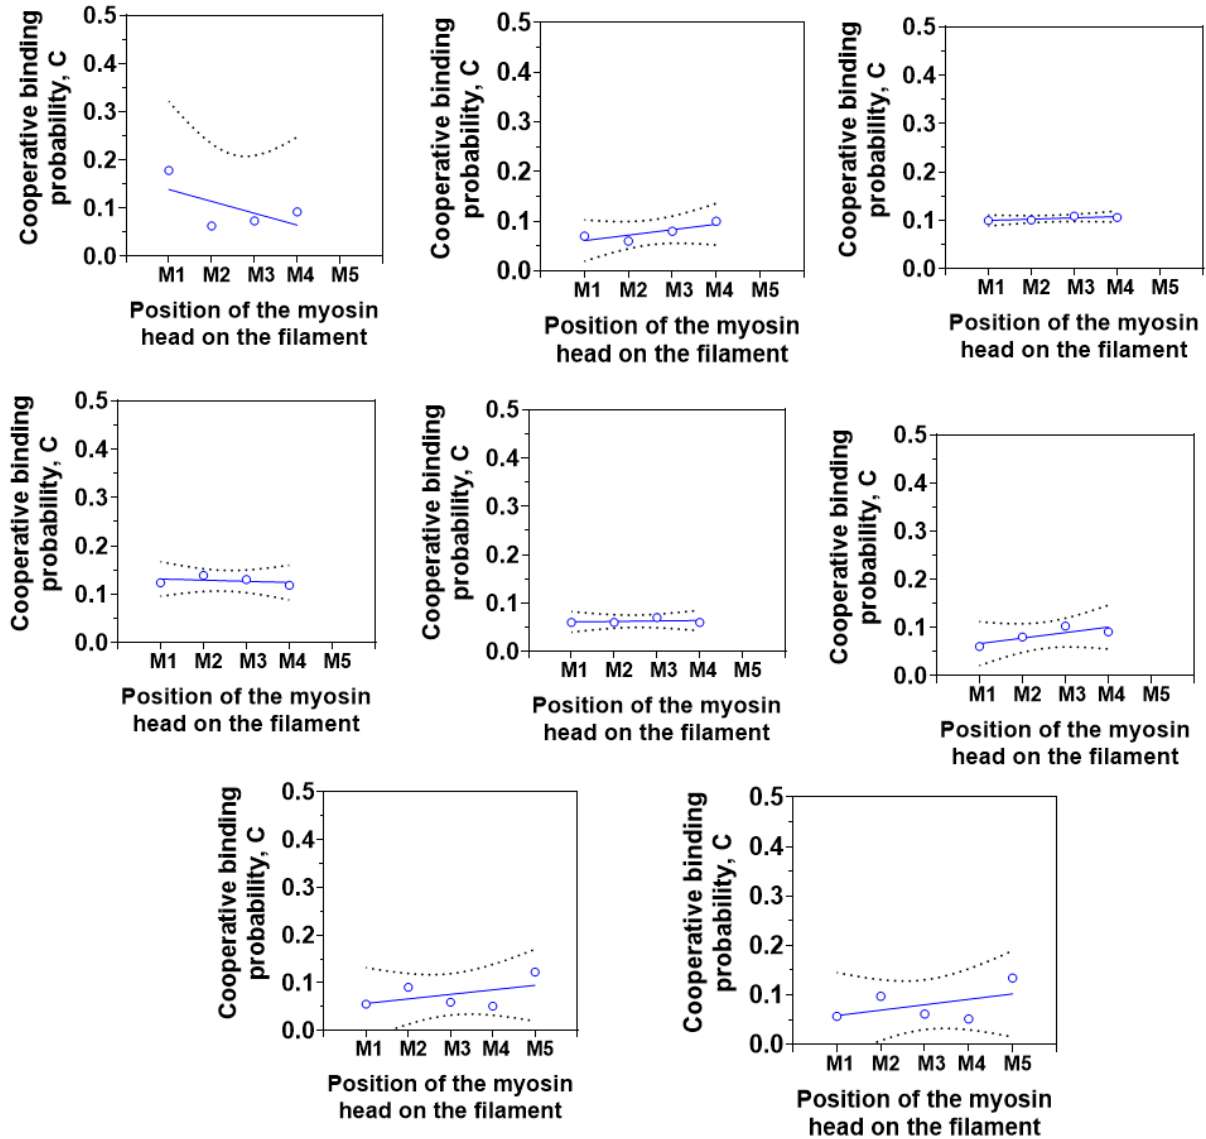

96

97 **Figure S6. Cooperative probability of the myosin heads bound to the non-regulatory F-**  
98 **actin.** The independent experiments showing different patterns of the cooperative probabilities  
99 between the one HMM molecule  $M_n$  and the next molecule  $M_{n+1}$  in the F-actin-HMM complex.  
100 The linear regression fittings showed in the solid lines and the dashed curves represented 95%  
101 CI.

102



103

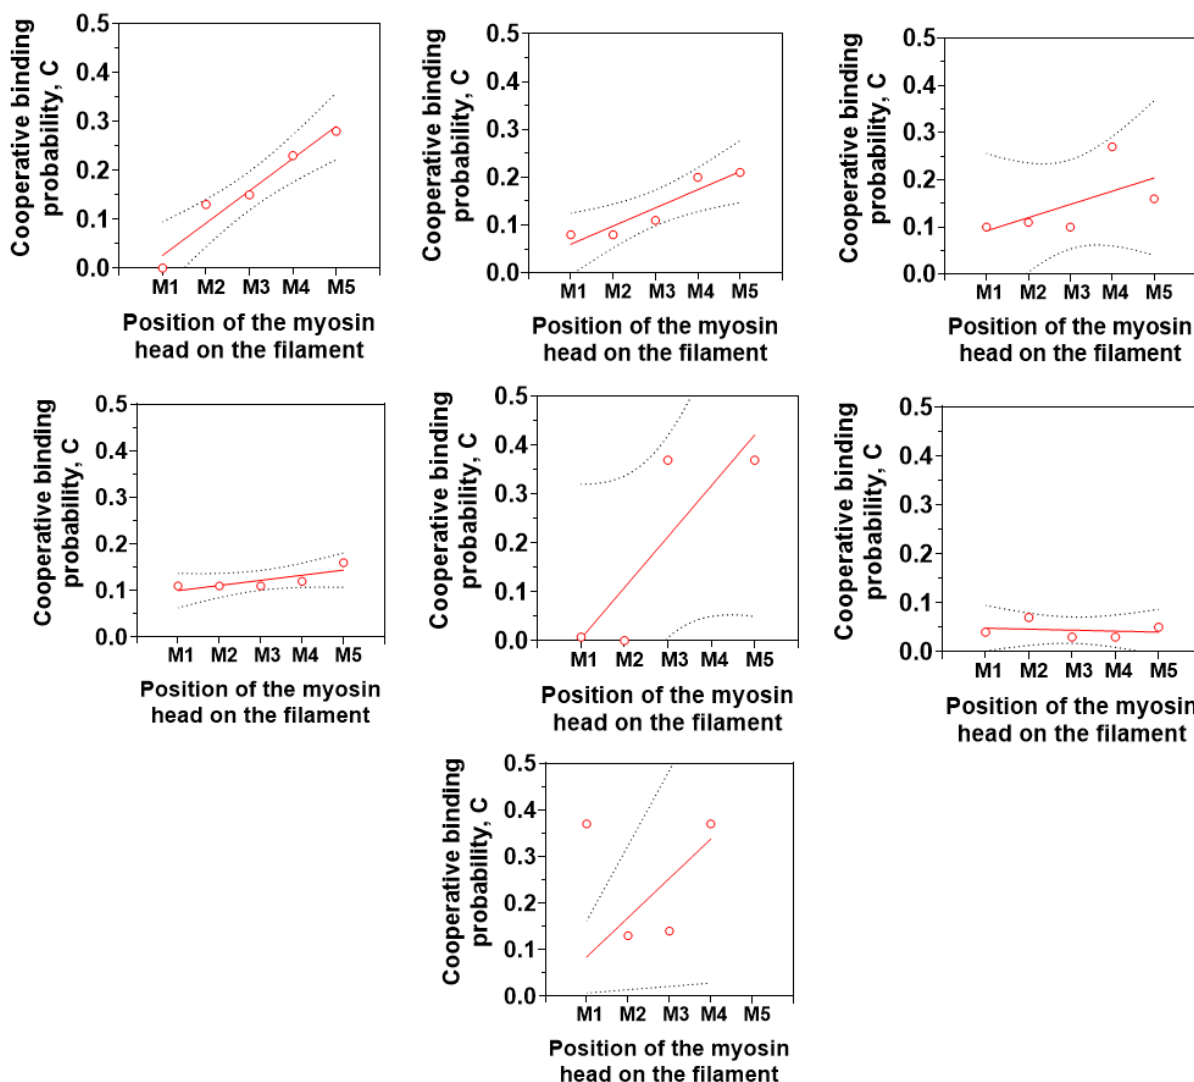

104

105 **Figure S7. Cooperative probability of the myosin heads bound to the regulatory cardiac**  
106 **TFs.** The independent experiments showing different patterns of the cooperative probabilities  
107 between the one HMM molecule  $M_n$  and the next molecule  $M_{n+1}$  in the cTFs-HMM complex. The  
108 observed differences, most likely related to the diverse population of activated / non-activated  
109 segments across the thin filament length that led to different degree of positive cooperativity of  
110 myosin bindings. The linear regression fittings showed in the solid lines and the dashed curves  
111 represented 95% CI.

112

113

114

115

116

117 To calculate the cooperative probability from observed probability patterns, we applied  
 118 the following equation  $C = \binom{n}{k} p^k (1 - p)^{n-k}$   
 119 where C denotes cooperative probability of binding, n = number of total events or  
 120 subsequent frames of the experiment; k = number of binding events in the experiment, p  
 121 = probability of binding, *i.e.* the ratio between binding events and total events and  $\binom{n}{k}$   
 122 represents the combination of the total and binding events expressed as:  $\frac{n!}{k!(n-k)!}$ .

123

124 **Table S1.** A concrete example of calculation of the cooperativity of binding for 4  
 125 neighboring HMM molecules bound to actin filaments in the presence of 10  $\mu$ M ATP.

126

| HMM molecules                                    | M1       | M2       | M3       | M4       |
|--------------------------------------------------|----------|----------|----------|----------|
| Number of total events (frames) for each HMM (n) | 176      | 176      | 176      | 176      |
| Binding events (k)                               | 171      | 61       | 37       | 21       |
| Binding probability (p)                          | 0.97     | 0.35     | 0.21     | 0.12     |
| 1-p                                              | 0.03     | 0.65     | 0.79     | 0.88     |
| p <sup>k</sup>                                   | 7.24E-03 | 8.49E-29 | 8.70E-26 | 4.08E-20 |
| n-k                                              | 5.00     | 115.00   | 139.00   | 155.00   |
| (1-p) <sup>(n-k)</sup>                           | 1.85E-08 | 5.58E-22 | 5.66E-15 | 2.80E-09 |
| $\binom{n}{k} = \frac{n!}{k!(n-k)!}$             | 1.33E+09 | 1.33E+48 | 1.50E+38 | 8.09E+26 |
| Cooperative probability (C)                      | 0.178    | 0.063    | 0.074    | 0.092    |

127

128

129

130

131

132

## 133 **Supplementary Movies**

### 134 **Movie S1**

135 Representative HS-AFM movies of the transient binding of skeletal HMM molecules  
136 bound between two actin filaments in the presence of 0.2  $\mu\text{M}$  Mg.ATP (top panel). The  
137 colored boxes indicated upper and / or lower HMM heads bound to actin filaments. The  
138 color code corresponded to the position of the HMM molecule on the actin filaments –  
139 1<sup>st</sup> molecule (M1): red box; 2<sup>nd</sup> molecule (M2): green box; 3<sup>rd</sup> molecule (M3): blue box;  
140 4<sup>th</sup> molecule (M4): magenta box; 5<sup>th</sup> molecule (M5): cyan box. The same color code was  
141 used in the mean probability binding of the HMM molecules to the actin filaments at the  
142 0.2  $\mu\text{M}$  Mg.ATP (bottom left graph). The average fractional occupation of the actin  
143 binding sites in the presence of 0.2  $\mu\text{M}$  Mg.ATP (bottom right graph). Scan area: 150 x  
144 90 nm<sup>2</sup>, 80 x 48 pixels<sup>2</sup>; recording rate 10 fps, playing rate 10 fps (left movie); 200 x 120  
145 nm<sup>2</sup>, 80 x 48 pixels<sup>2</sup>, recording rate 12.5 fps, playing rate 10 fps (central movie); 200 x  
146 120 nm<sup>2</sup>, 80 x 48 pixels<sup>2</sup>, recording rate 10 fps, playing rate 10 fps (right movie). The  
147 scale bars are 30 nm.

148

### 149 **Movie S2**

150 Representative HS-AFM movies of the transient binding of skeletal HMM molecules  
151 bound between two actin filaments in the presence of 2  $\mu\text{M}$  Mg.ATP (top panel). The  
152 colored boxes indicated upper and / or lower HMM heads bound to actin filaments. The  
153 color code corresponded to the position of the HMM molecule on the actin filaments –  
154 1<sup>st</sup> molecule (M1): red box; 2<sup>nd</sup> molecule (M2): green box; 3<sup>rd</sup> molecule (M3): blue box;  
155 4<sup>th</sup> molecule (M4): magenta box; 5<sup>th</sup> molecule (M5): cyan box. The same color code was  
156 used in the mean probability binding of the HMM molecules to the actin filaments at the  
157 2  $\mu\text{M}$  Mg.ATP (bottom left graph). The average fractional occupation of the actin binding  
158 sites in the presence of 2  $\mu\text{M}$  Mg.ATP (bottom right graph). Scan area: 150 x 75 nm<sup>2</sup>, 80  
159 x 40 pixels<sup>2</sup>; recording rate 3.3 fps, playing rate 10 fps; scale bar is 30 nm (left movie);  
160 100 x 60 nm<sup>2</sup>, 80 x 48 pixels<sup>2</sup>; recording rate 6.7 fps, playing rate 10 fps, scale bar is 20  
161 nm (central movie); 100 x 60 nm<sup>2</sup>, 80 x 40 pixels<sup>2</sup>; recording rate 6.7 fps, playing rate 10  
162 fps, scale bar is 20 nm (right movie).

163 **Movie S3**

164 Representative HS-AFM movies of the transient binding of skeletal HMM molecules  
165 bound between two actin filaments in the presence of 10  $\mu\text{M}$  Mg.ATP (top panel). The  
166 colored boxes indicated upper and / or lower HMM heads bound to actin filaments. The  
167 color code corresponded to the position of the HMM molecule on the actin filaments –  
168 1<sup>st</sup> molecule (M1): red box; 2<sup>nd</sup> molecule (M2): green box; 3<sup>rd</sup> molecule (M3): blue box;  
169 4<sup>th</sup> molecule (M4): magenta box; 5<sup>th</sup> molecule (M5): cyan box. The same color code was  
170 used in the mean probability binding of the HMM molecules to the actin filaments at the  
171 10  $\mu\text{M}$  Mg.ATP (bottom left graph). The average fractional occupation of the actin  
172 binding sites in the presence of 10  $\mu\text{M}$  Mg.ATP (bottom right graph). Scan area: 150 x  
173 75  $\text{nm}^2$ , 80 x 40 pixels<sup>2</sup>; recording rate 10 fps, playing rate 10 fps (left movie); 150 x 75  
174  $\text{nm}^2$ , 80 x 40 pixels<sup>2</sup>, recording rate 6.7 fps, playing rate 10 fps (central movie); 150 x 75  
175  $\text{nm}^2$ , 80 x 40 pixels<sup>2</sup>, recording rate 10 fps, playing rate 10 fps (right movie). The scale  
176 bars are 30 nm.

177

178 **Movie S4**

179 Representative HS-AFM movies of the transient binding of skeletal HMM molecules  
180 bound between two cTFs in the presence of 0.5 or 2  $\mu\text{M}$  Mg.ATP (top panel). The  
181 colored boxes indicated upper and / or lower HMM heads bound to cTFs. The color  
182 code corresponded to the position of the HMM molecule on the thin filaments – 1<sup>st</sup>  
183 molecule (M1): red box; 2<sup>nd</sup> molecule (M2): green box; 3<sup>rd</sup> molecule (M3): blue box; 4<sup>th</sup>  
184 molecule (M4): magenta box; 5<sup>th</sup> molecule (M5): cyan box. The same color code was  
185 used in the mean probability binding of the HMM molecules to the cTFs at the 0.5  $\mu\text{M}$  or  
186 2  $\mu\text{M}$  Mg.ATP (middle panel). The average fractional occupations of the binding sites in  
187 the presence of 0.5  $\mu\text{M}$  or 2  $\mu\text{M}$  Mg.ATP (bottom panel). Scan area: 200 x 200  $\text{nm}^2$ , 120  
188 x 120 pixels<sup>2</sup>; recording rate 2 fps, playing rate 5 fps (left movie); Scan area: 200 x 200  
189  $\text{nm}^2$ , 120 x 120 pixels<sup>2</sup>; recording rate 2 fps, playing rate 5 fps (central movie); 150 x 75  
190  $\text{nm}^2$ , 80 x 40 pixels<sup>2</sup>, recording rate 6.7 fps, playing rate 10 fps (top right movie); 150 x  
191 75  $\text{nm}^2$ , 80 x 40 pixels<sup>2</sup>, recording rate 6.7 fps, playing rate 10 fps (bottom right movie).  
192 The scale bars are 30 nm.
